# Supplementary material for: Hantzsch reaction on free nano-Fe2O3 catalyst: excellent reactivity combined with facile catalyst recovery and recyclability
Source: Royal Society of Chemistry journal article supplement (doi:10.1039/c1cc12693h), 2011-01-01
Supplement: c1cc12693h_2.pdf [file c1cc12693h_2.pdf]

Supplementary Material (ESI) for Chemical Communications  
This journal is (c) The Royal Society of Chemistry 2011

Electronic Supplementary Information (ESI) for:

**Hantzsch reaction on free nano-Fe<sub>2</sub>O<sub>3</sub> catalyst: Excellent reactivity  
combined with facile catalyst recovery and recyclability**

Nadiya Koukabi,<sup>a</sup> Eskandar Kolvari,<sup>\*b</sup> Ardeshtir Khazaei,<sup>\*a</sup> Mohammad  
Ali Zolfigol,<sup>\*a</sup> Behzad Shirmardi-Shagasemi<sup>c</sup>  
and Hamid Reza Khavasi<sup>d</sup>

<sup>a</sup>. Faculty of Chemistry, Bu-Ali Sina University, Hamedan 6517838683,  
Iran

<sup>b</sup>Department of Chemistry, Faculty of Science Semnan University,  
Semnan, Iran

<sup>c</sup> Department of Science, Payam Noor University, Hamedan, Iran.

<sup>d</sup>Department of Chemistry, Shahid Beheshti University, Tehran, Iran.

E-mail: [kolvari@semnan.ac.ir](mailto:kolvari@semnan.ac.ir), [zolfi@basu.ac.ir](mailto:zolfi@basu.ac.ir),  
[Khzaei\\_1326@yahoo.com](mailto:Khzaei_1326@yahoo.com)

Supplementary Material (ESI) for Chemical Communications  
 This journal is (c) The Royal Society of Chemistry 2011

## TABLE OF CONTENTS

| Contents                                                                                    | Page |
|---------------------------------------------------------------------------------------------|------|
| Instrumentation, Analysis and Starting Materials .....                                      | 3    |
| Experimental .....                                                                          | 3    |
| General procedure for the synthesis of nano- $\gamma$ -Fe <sub>2</sub> O <sub>3</sub> ..... | 4    |
| XPS spectrum of nano Fe <sub>3</sub> O <sub>4</sub> . ....                                  | 5    |
| XPS spectrum of nano- $\gamma$ -Fe <sub>2</sub> O <sub>3</sub> . ....                       | 6    |
| XPS spectrum of nano- $\gamma$ -Fe <sub>2</sub> O <sub>3</sub> after reuse five times ..... | 7    |
| XRD pattern of the nano- $\gamma$ -Fe <sub>2</sub> O <sub>3</sub> . ....                    | 8    |
| VSM pattern of the nano- $\gamma$ -Fe <sub>2</sub> O <sub>3</sub> . ....                    | 8    |
| FTIR spectrum of nano- $\gamma$ -Fe <sub>2</sub> O <sub>3</sub> . ....                      | 9    |
| Photographs of suspension of nano- $\gamma$ -Fe <sub>2</sub> O <sub>3</sub> . ....          | 9    |
| X-ray structure of 4g.. ....                                                                | 10   |
| Spectral data .....                                                                         | 11   |
| References .....                                                                            | 32   |

Supplementary Material (ESI) for Chemical Communications  
This journal is (c) The Royal Society of Chemistry 2011

## **Instrumentation, Analysis and Starting Materials:**

### **Experimental:**

**General:** All chemicals were purchased from Merck, Fluka or Acros companies and used without any further purification. Nano- $\gamma$ -Fe<sub>2</sub>O<sub>3</sub> was prepared with the reported method.<sup>1-2</sup> NMR spectra were recorded with a Bruker Avance 300 spectrometer (<sup>1</sup>HNMR 300 MHz and <sup>13</sup>CNMR 75 MHz) in pure deuteriated chloroform, acetone and dimethyl sulfoxide with tetramethylsilane (TMS) as the internal standard. X-ray data was measured on a STOE IPDS-II two circle diffractometer at 120 K, using graphite monochromated Mo Ka X-ray radiation ( $k = 0.7107 \text{ \AA}$ ). Suitable crystal was obtained from ethanol solution by the slow evaporation of the solvent over several days. Scanning electron microscope (SEM, Philips, XL30, Netherlands) was used for preparation of SEM images. Transmission electron microscope, TEM (Philips CM10) was also used to obtain TEM images. The crystal structure of synthesized materials was determined by an X-ray diffractometer (XRD) (38066 RIVA, d/G. Via M. Misone, 11/D (TN), Italy) at ambient temperature. XPS spectra were acquired using a Kratos Axis ULTRA “DLD” X-ray photoelectron spectrometer equipped with a monochromatic Al-KR X-ray source. The pass energies were 160eV for the survey scans and 20 eV for the high

Supplementary Material (ESI) for Chemical Communications  
This journal is (c) The Royal Society of Chemistry 2011

resolution scans. The instrument was operated in electrostatic mode as the samples were magnetic. The magnetic measurement was carried out in a vibrating sample magnetometer (VSM) (4 inch, Daghigh Meghnatis Kashan Co., Kashan, Iran) at room temperature.

### **General procedure for the synthesis of nano- $\gamma$ -Fe<sub>2</sub>O<sub>3</sub>:**

Magnetite (Fe<sub>3</sub>O<sub>4</sub>) nanoparticles were prepared by partial reduction coprecipitation method based on the procedure of S.C. Qu, H.B. Yang, S.H. Kan, et al.<sup>2</sup> 3 mL FeCl<sub>3</sub> (2 mol L<sup>-1</sup> dissolved in 2 mol L<sup>-1</sup> HCl) was added to 10.33 mL double distilled water, and 2 mL Na<sub>2</sub>SO<sub>3</sub> (1 mol L<sup>-1</sup>) was added to the former solution dropwise in 1min under magnetic stirring. When the color of the solution turned back from red to light yellow, the solution was added to 80 mL NH<sub>3</sub>·H<sub>2</sub>O solution (0.85 mol L<sup>-1</sup>) under vigorous stirring. After 30 min, the magnetite precipitates were washed to pH<7.5 by deoxygenated water. The black precipitate obtained above was diluted to a volume of 168 mL with a mass concentration of 6 mg mL<sup>-1</sup>. The pH of the suspension was adjusted to 3.0 with HCl (0.1 mol L<sup>-1</sup>) and the pH was kept stable for 5min. The temperature of the suspension was raised to 90 °C in 5min, and was stirred under aeration (with air) for 60 min at about 100 °C. The reddish-brown solution was washed with water by magnetic decantation four times.<sup>1</sup>

Supplementary Material (ESI) for Chemical Communications  
This journal is (c) The Royal Society of Chemistry 2011

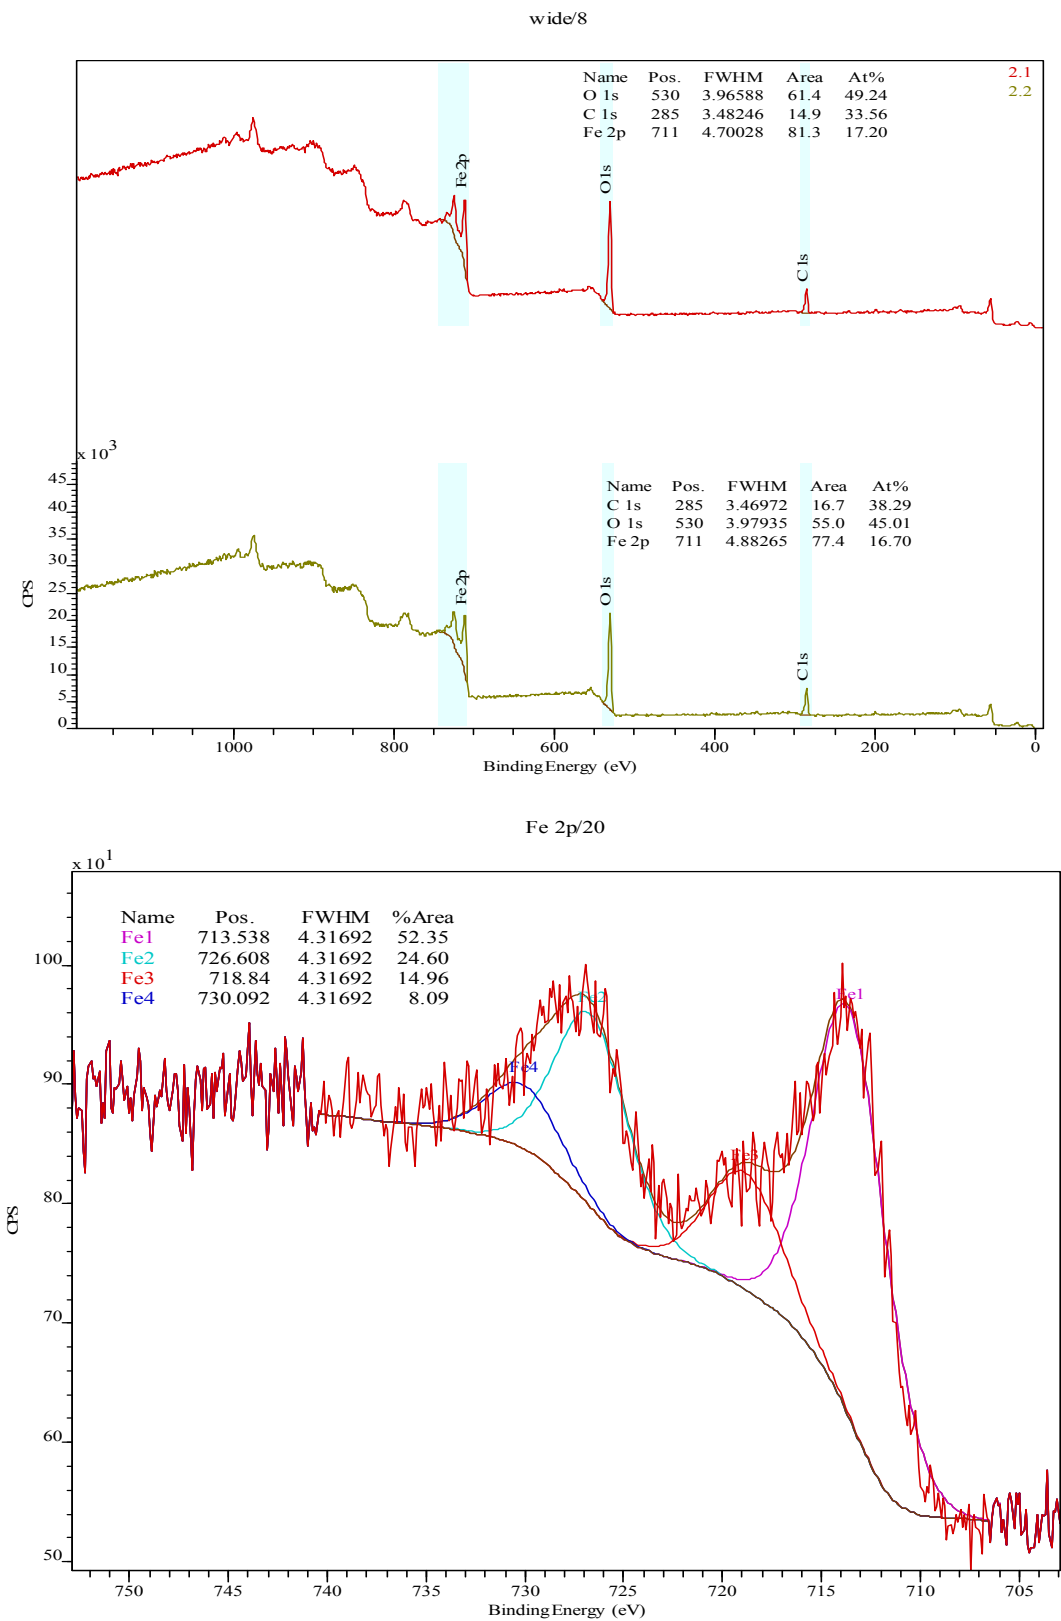

Supplementary Material (ESI) for Chemical Communications  
This journal is (c) The Royal Society of Chemistry 2011

**Figure S1.** XPS spectrum of nano  $\text{Fe}_3\text{O}_4$ .

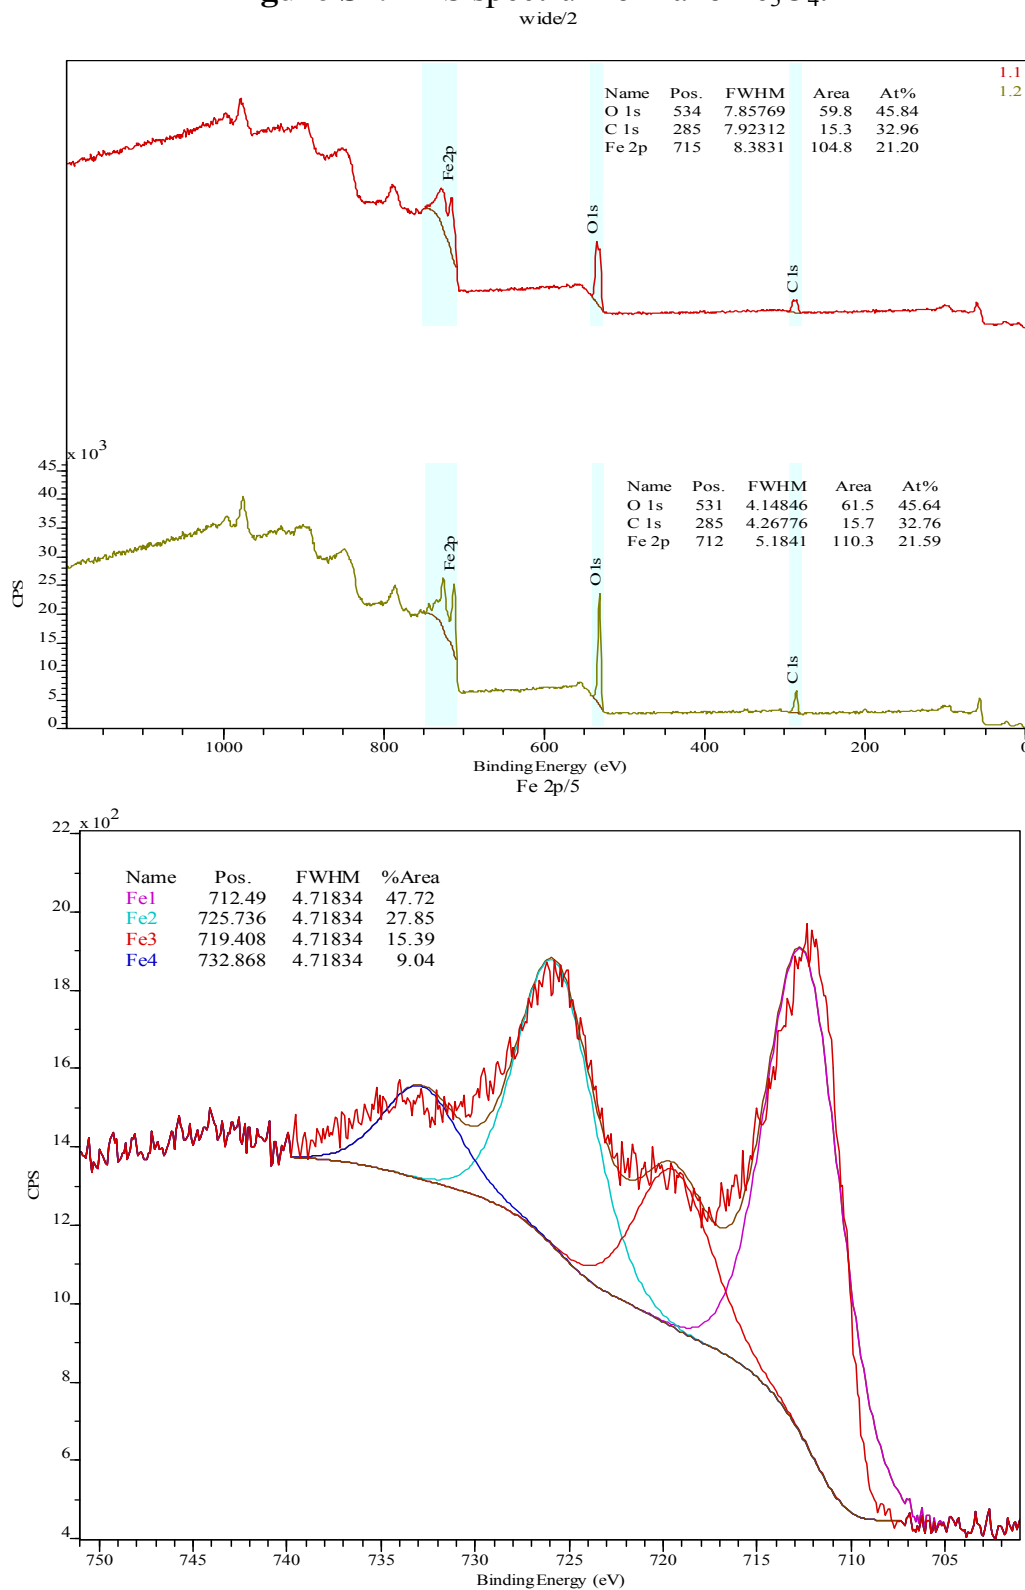

**Figure S2.** XPS spectrum of nano- $\gamma\text{-Fe}_2\text{O}_3$ .

Supplementary Material (ESI) for Chemical Communications  
This journal is (c) The Royal Society of Chemistry 2011

wide/26

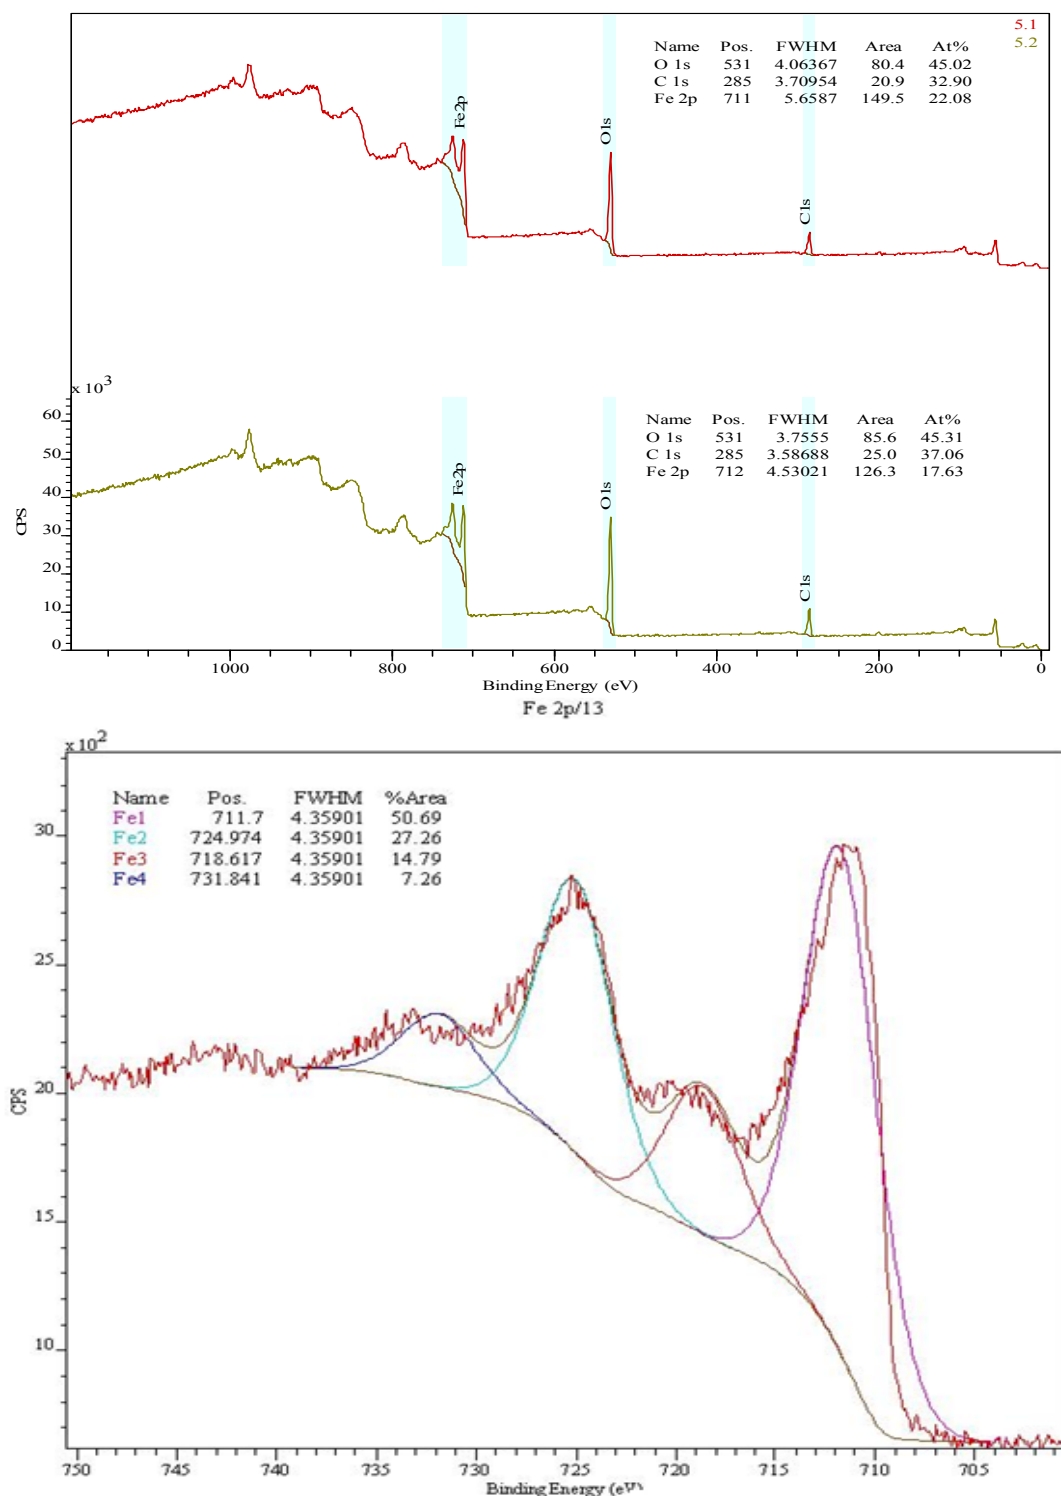

**Figure S3.** XPS spectrum of nano- $\gamma$ -Fe<sub>2</sub>O<sub>3</sub> after reuse five times.

Supplementary Material (ESI) for Chemical Communications  
This journal is (c) The Royal Society of Chemistry 2011

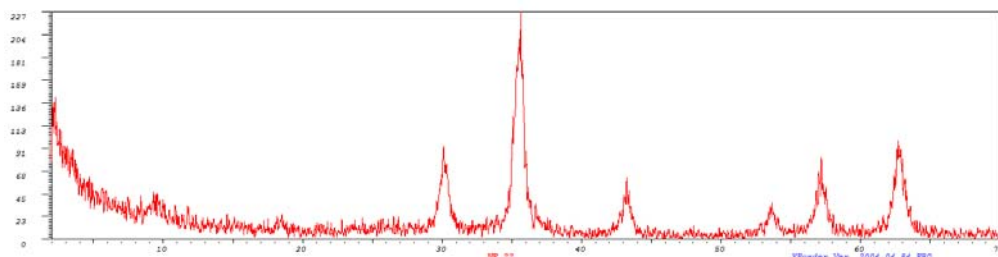

**Figure S4.** XRD patterns of the nano- $\gamma$ - $\text{Fe}_2\text{O}_3$ .<sup>4-5</sup>

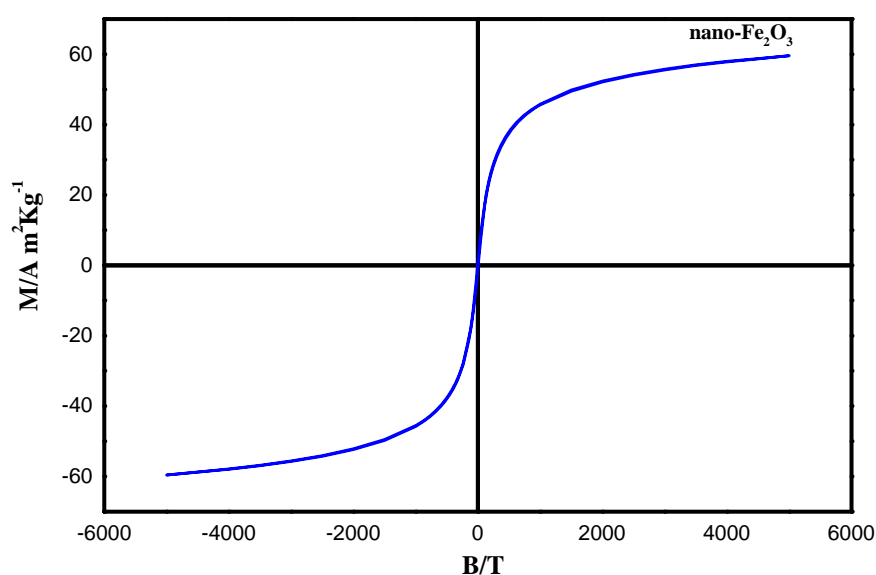

**Figure S5:** Magnetization curve for the  $\text{Fe}_2\text{O}_3$  nanoparticles at room temperature.

The room-temperature magnetization curve of the magnetic nanoparticles proves that the magnetic nanoparticles are superparamagnetic. The saturation magnetization of  $\sim 60 \text{ emu/g}$  was determined for the fine  $\text{Fe}_2\text{O}_3$  nanoparticles.



Supplementary Material (ESI) for Chemical Communications  
This journal is (c) The Royal Society of Chemistry 2011

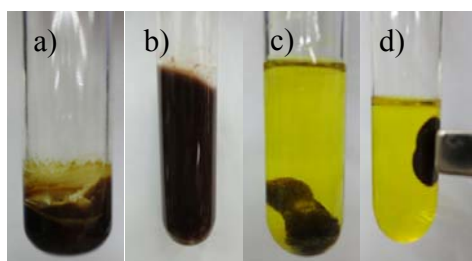

**Figure S6:** Photographs of suspension of nano- $\gamma$ -Fe<sub>2</sub>O<sub>3</sub> before (a, b) and after (c, d) magnetic capture.

The particles suspended smoothly by eccentricity force after the magnet bar start to stir, so that, the suspended Fe<sub>2</sub>O<sub>3</sub> particles turned the reaction color into smooth brown during the reaction. Because of the reaction carried out in solvent free condition and the product is in viscose form, in order to make separation easier, at the end of the reaction, the mixture was triturated with ethyl acetate and after 10 s suspended particles moved on to the stirrer bar. Using an external magnet can make the separation of Nps easier during the cycling.

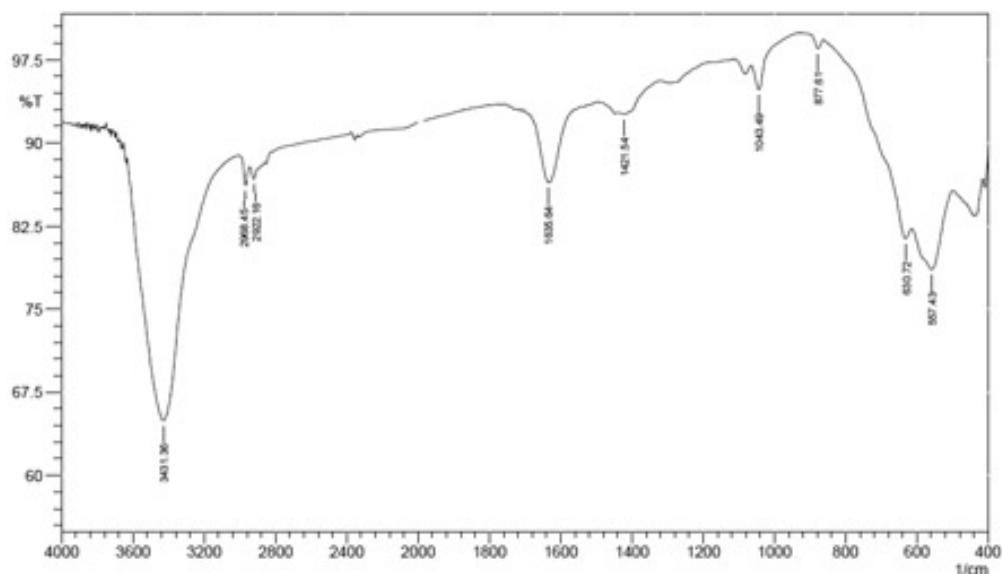

**Figure S7:** FTIR spectra of  $\gamma$ -Fe<sub>2</sub>O<sub>3</sub> nanoparticles.<sup>6</sup>

Supplementary Material (ESI) for Chemical Communications  
This journal is (c) The Royal Society of Chemistry 2011

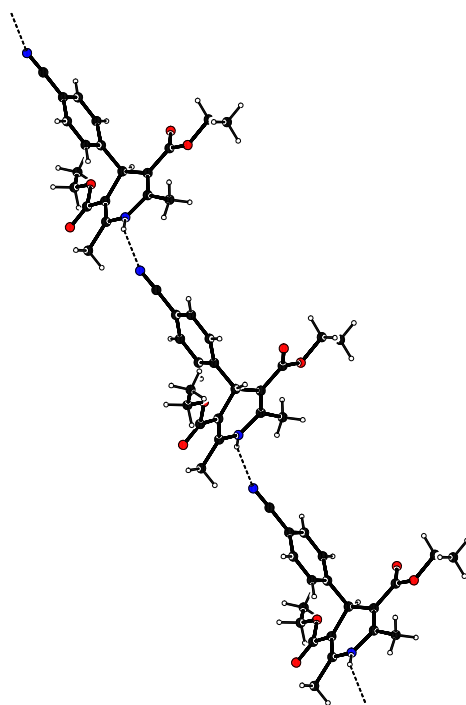

**Figure S8.** X-ray structure of 4g.

Supplementary Material (ESI) for Chemical Communications  
This journal is (c) The Royal Society of Chemistry 2011

## Spectral data:

### Diethyl 2,6-dimethyl-4-phenyl-1,4-dihydropyridine-3,5-dicarboxylate<sup>7</sup>

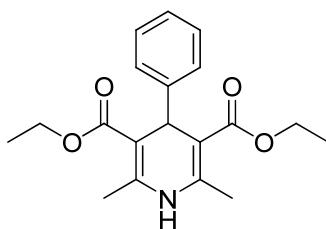

Mp: 157-159 °C; <sup>1</sup>H NMR (CDCl<sub>3</sub>, 300 MHz): δ (ppm): 1.15 (t, 6 H), 2.22 (s, 6 H), 4.0 (q, 4 H), 4.93 (s, 1 H), 6.2 (b, 1 H), 7.04-7.22 (m, 5 H); <sup>13</sup>C NMR (CDCl<sub>3</sub>, 75 MHz): δ (ppm): 14.26, 19.40, 39.63, 59.74, 103.93, 126.1, 127.84, 127.98, 144.23, 147.85, 167.81; Elemental Analysis: Calcd. C: 69.28, H: 7.04, N: 4.25, O: 19.43, Found. C: 69.12, H: 7.00, N: 4.21, O: 19.39.

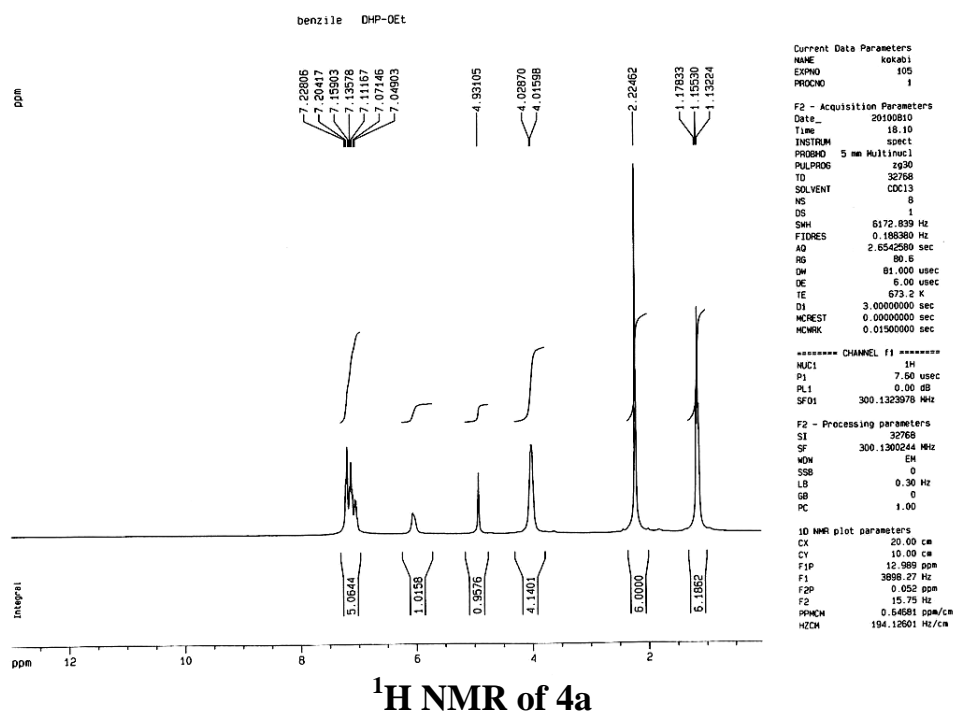

Supplementary Material (ESI) for Chemical Communications  
This journal is (c) The Royal Society of Chemistry 2011

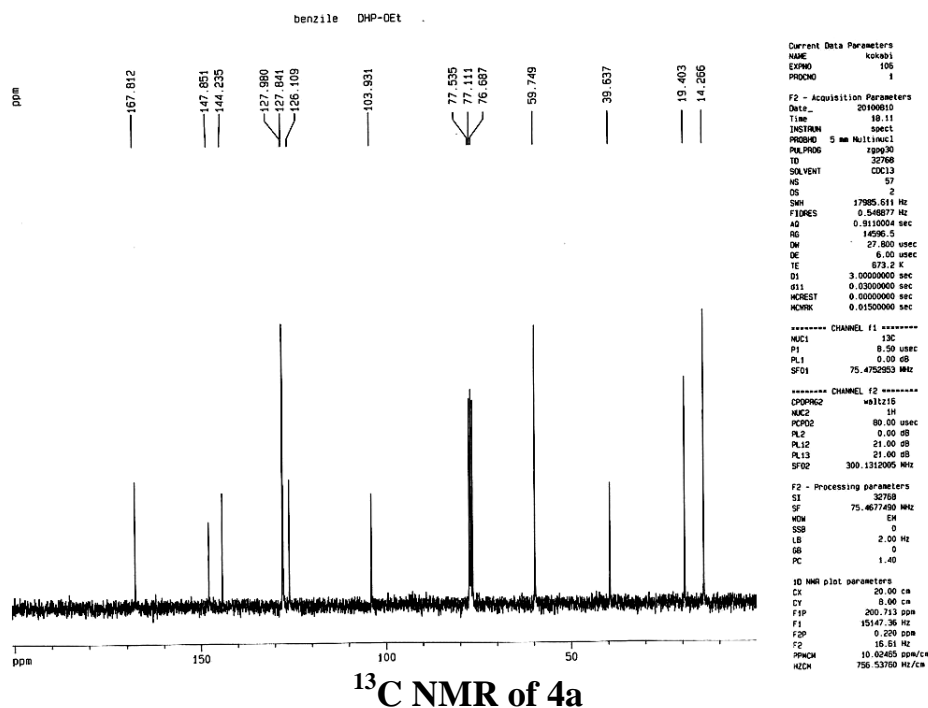

**Diethyl 4-(4-chlorophenyl)-2,6-dimethyl-1,4-dihydropyridine-3,5-dicarboxylate<sup>7</sup>**

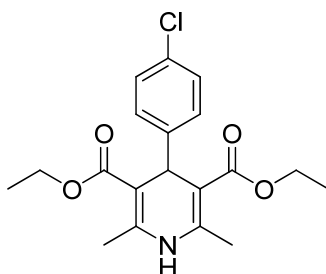

Mp: 144-146 °C; <sup>1</sup>H NMR (CDCl<sub>3</sub>, 300 MHz): δ (ppm): 1.16-1.11 (t, 6 H), 2.19 (s, 6 H), 4.03-5.96 (q, 4 H), 4.89 (s, 1 H), 6.30 (s, 1 H), 7.15-7.06 (q, 4 H); <sup>13</sup>C NMR (CDCl<sub>3</sub>, 75 MHz): δ (ppm): 14.27, 19.31, 39.24, 59.85, 103.50, 127.92, 129.36, 131.66, 144.56, 146.45, 167.68; Elemental Analysis: Calcd. C: 62.72, H: 6.09, N: 3.85, O: 17.59, Found. C: 62.46, H: 6.02, N: 3.80, O: 17.48.

Supplementary Material (ESI) for Chemical Communications  
This journal is (c) The Royal Society of Chemistry 2011

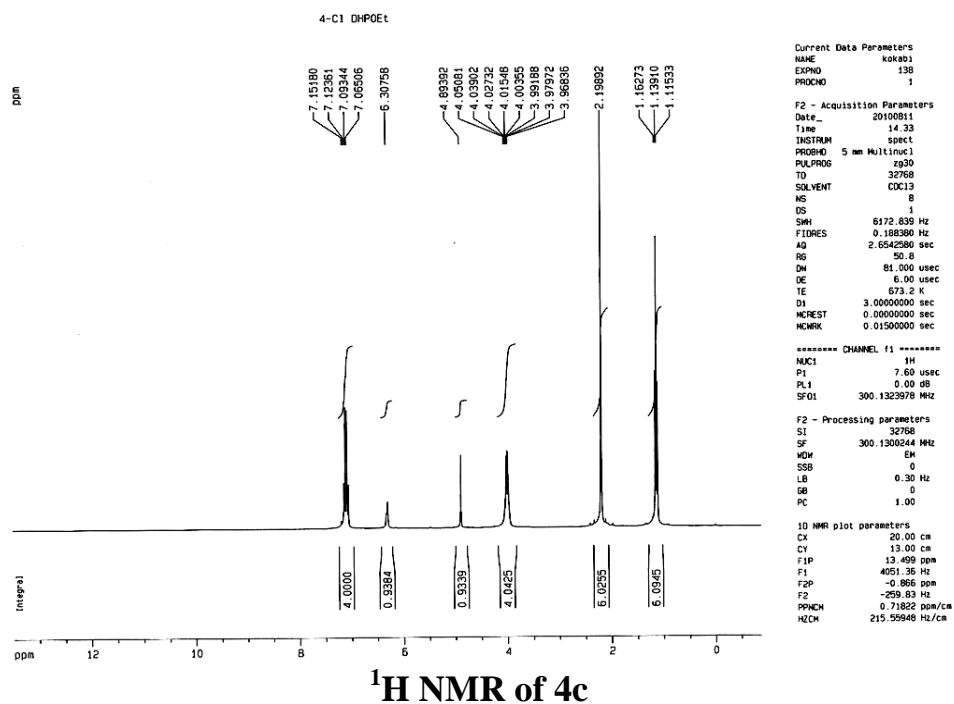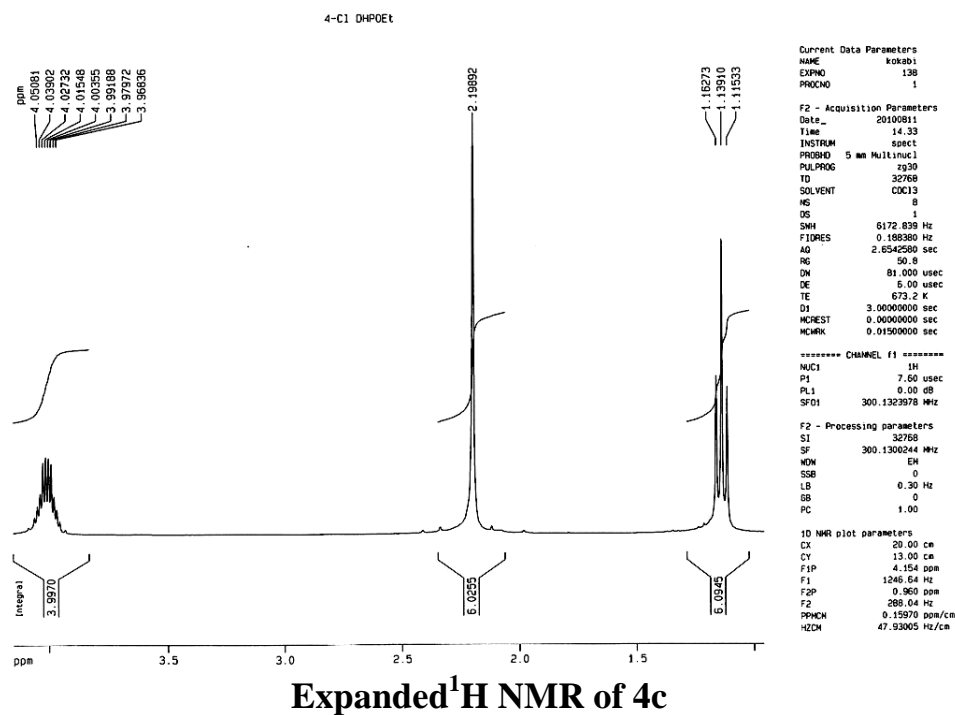

Supplementary Material (ESI) for Chemical Communications  
This journal is (c) The Royal Society of Chemistry 2011

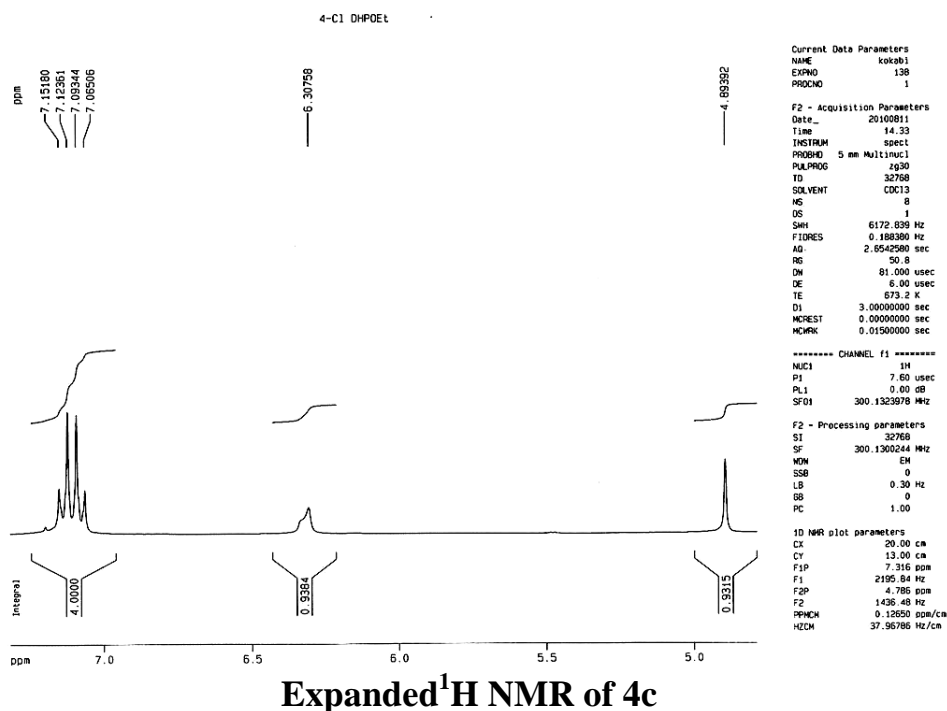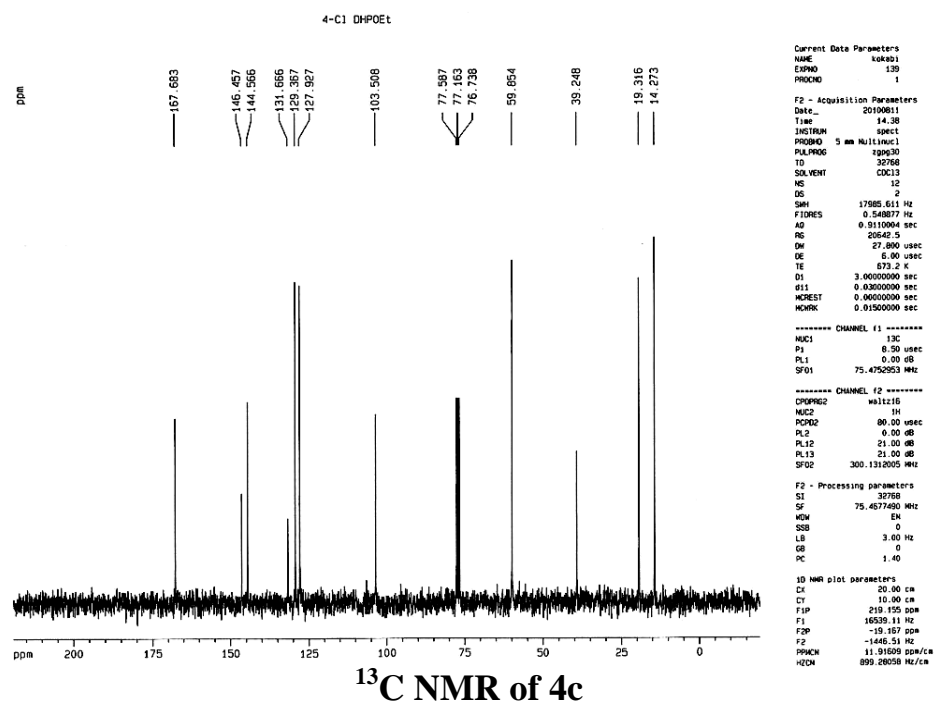

Supplementary Material (ESI) for Chemical Communications  
This journal is (c) The Royal Society of Chemistry 2011

# Diethyl 4-(4-hydroxyphenyl)-2,6-dimethyl-1,4-dihydropyridine-3,5-dicarboxylate<sup>8</sup>

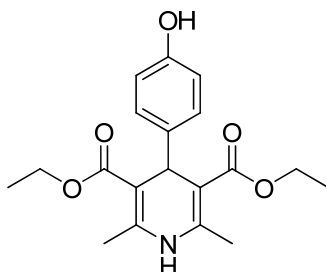

Mp: 230-231 °C; <sup>1</sup>H NMR (CDCl<sub>3</sub>, 300 MHz): δ (ppm): 1.13-1.9(t, 6 H), 2.23 (s, 6 H), 3.99-3.93 (q, 4 H), 4.86 (s, 1 H), 7.04-6.56 (m, 4 H), 7.90(s, 1H), 7.98(s,1H); <sup>13</sup>C NMR (Acetone D, 75 MHz): δ (ppm): 13.77, 17.87, 38.54, 58.87, 103.39, 114.40, 128.83, 139.76, 144.38, 155.54, 167.23; Elemental Analysis: Calcd. C: 66.07, H: 6.71, N: 4.06, O: 23.16, Found. C: 65.77, H: 6.63, N: 3.95, O: 23.10.

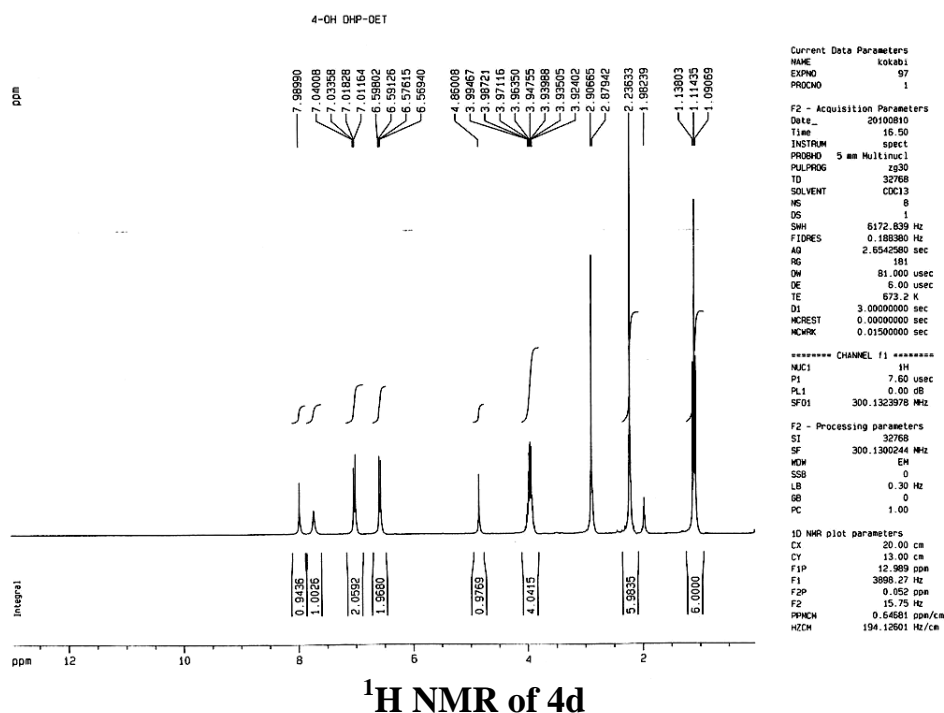

Supplementary Material (ESI) for Chemical Communications  
This journal is (c) The Royal Society of Chemistry 2011

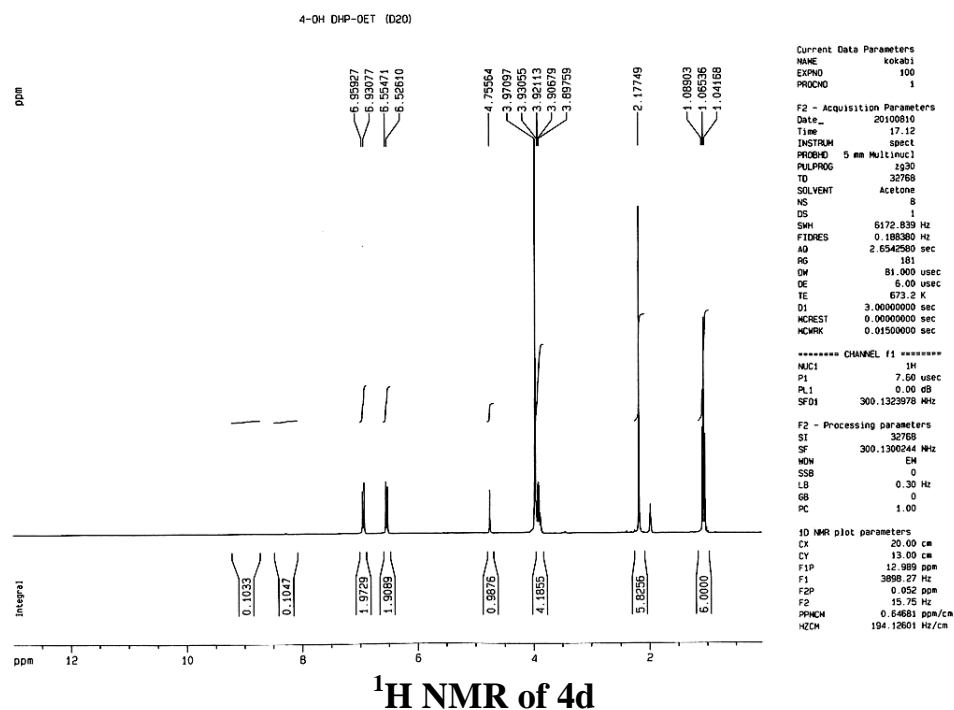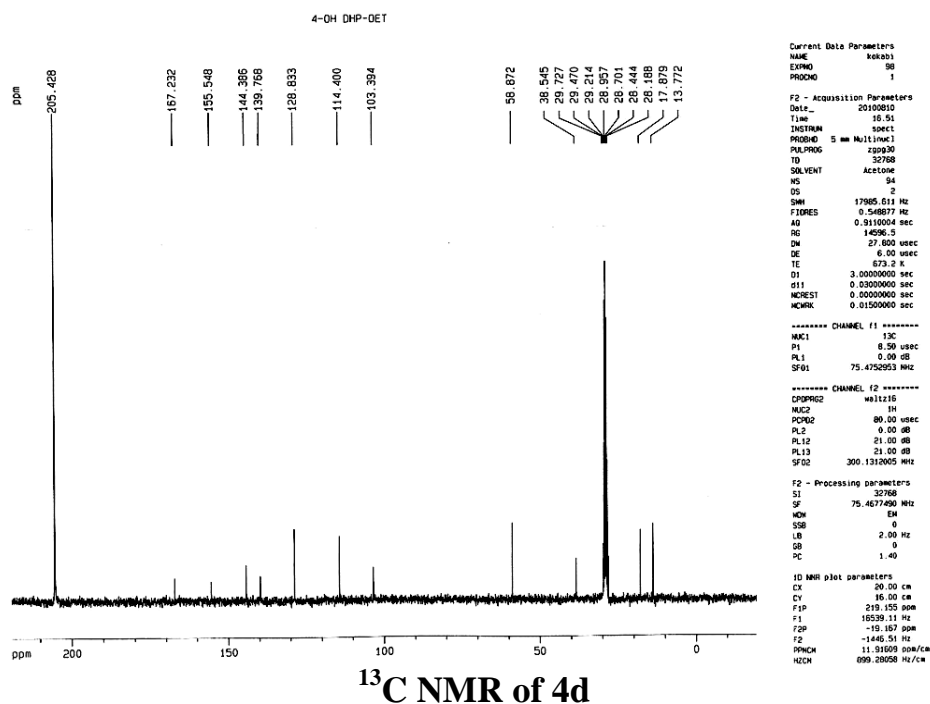



Supplementary Material (ESI) for Chemical Communications  
This journal is (c) The Royal Society of Chemistry 2011

## Diethyl 4-(4-cyanophenyl)-2,6-dimethyl-1,4-dihydropyridine-3,5-dicarboxylate

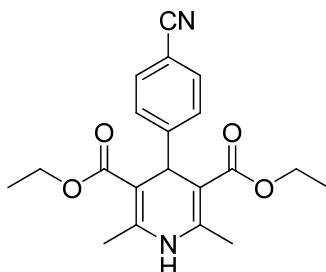

Mp: 165-167 °C;  $^1\text{H}$  NMR ( $\text{CDCl}_3$ , 300 MHz):  $\delta$  (ppm): 1.10 (t, 6 H), 2.20 (s, 6 H), 4.0 (q, 4 H), 4.95 (s, 1 H), 6.22 (b, 1 H), 7.30-7.43 (m, 4 H);  $^{13}\text{C}$  NMR ( $\text{CDCl}_3$ , 75 MHz):  $\delta$  (ppm): 14.25, 19.36, 40.4, 59.93, 102.93, 109.52, 119.35, 128.87, 131.87, 145.03, 163.28, 167.27; Elemental Analysis: Calcd. C: 67.78, H: 6.26, N: 7.90, O: 18.06, Found. C: 67.71, H: 6.22, N: 7.89, O: 18.01.

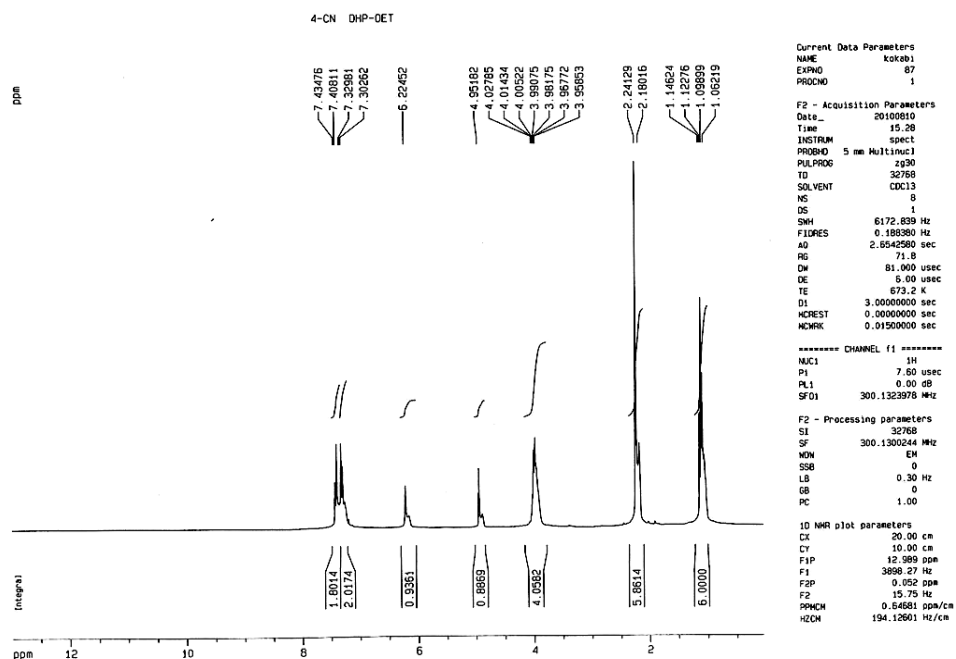

$^1\text{H}$  NMR of 4h

Supplementary Material (ESI) for Chemical Communications  
This journal is (c) The Royal Society of Chemistry 2011

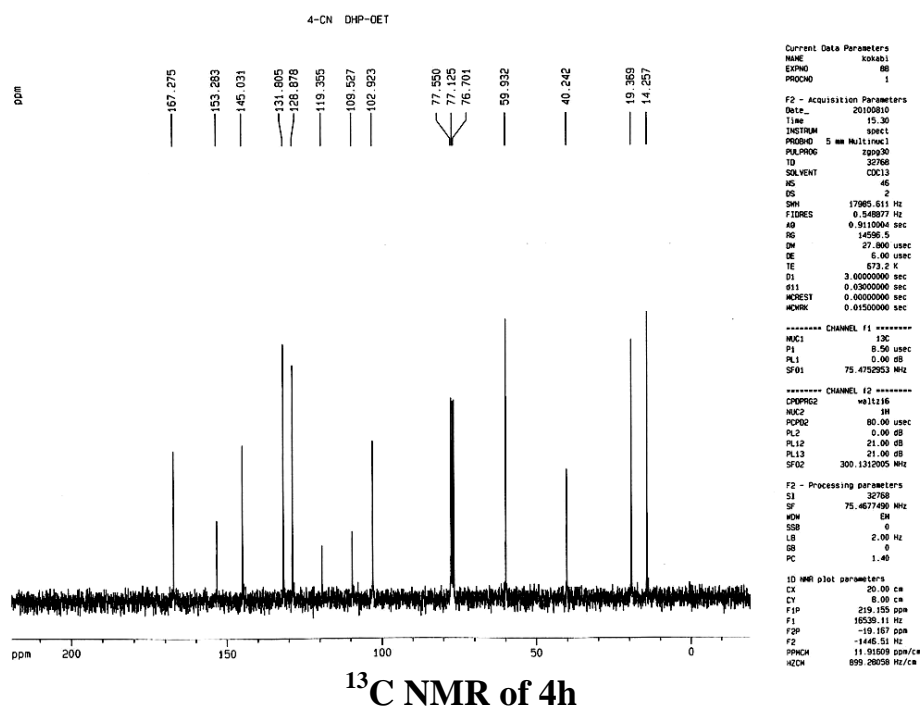

**Diethyl 4-(3-chlorophenyl)-2,6-dimethyl-1,4-dihydropyridine-3,5-dicarboxylate<sup>7</sup>**

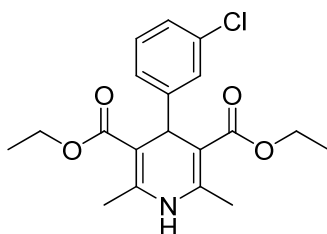

Mp: 141-142 °C; <sup>1</sup>H NMR (CDCl<sub>3</sub>, 300 MHz): δ (ppm): 1.15 (t, 6 H), 2.23-2.09(s, 6 H), 4.04-3.96 (q, 4 H), 4.89 (s, 1 H), 6.2 (s, 1 H), 7.16-7.03 (m, 4 H); <sup>13</sup>C NMR (CDCl<sub>3</sub>, 75 MHz): δ (ppm): 14.21, 19.47, 39.68, 59.86, 103.50, 126.24, 126.30, 128.23, 129.06, 133.56, 144.45, 149.81, 167.49; Elemental Analysis: Calcd. C: 62.72, H: 6.09, N: 3.85, O: 17.59, Found. C: 62.68, H: 6.01, N: 3.78, O: 17.52.

Supplementary Material (ESI) for Chemical Communications  
This journal is (c) The Royal Society of Chemistry 2011

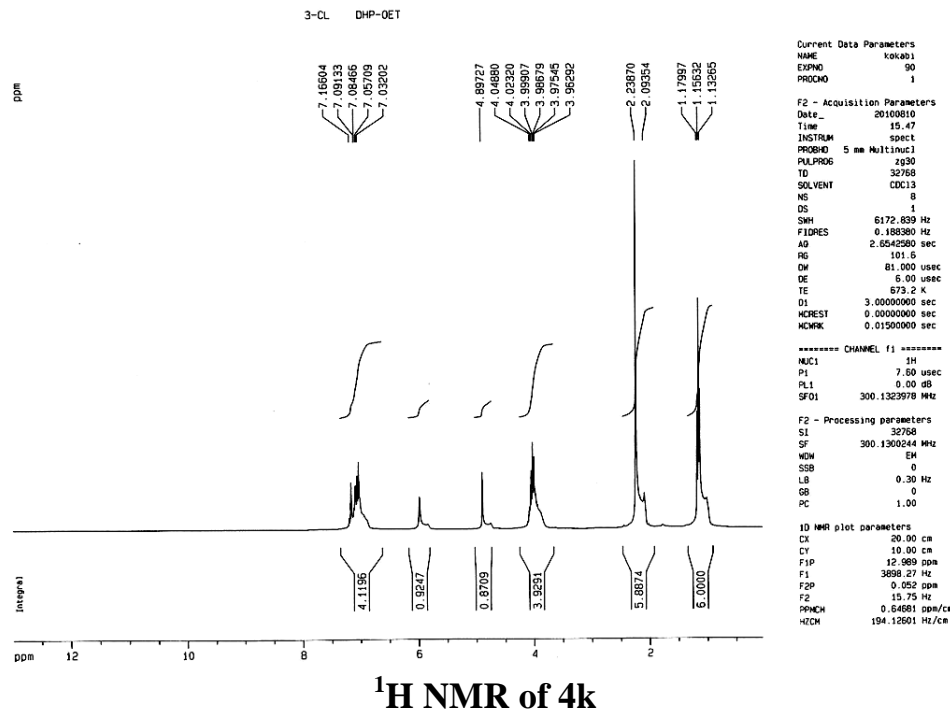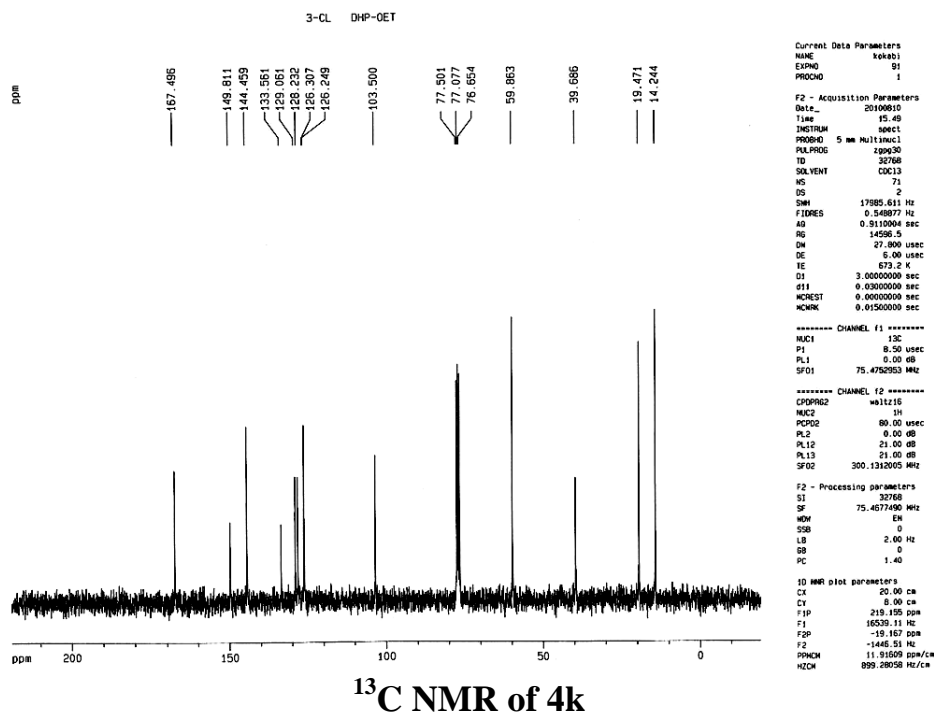

Supplementary Material (ESI) for Chemical Communications  
This journal is (c) The Royal Society of Chemistry 2011

## Diethyl 4-(4-hydroxy-3-methoxyphenyl)-2,6-dimethyl-1,4-dihydropyridine-3,5-dicarboxylate

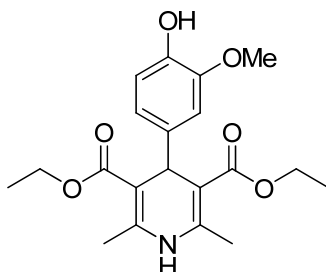

Mp: 159-161°C;  $^1\text{H}$  NMR (DMSO, 300 MHz):  $\delta$  (ppm): 1.07 (t, 6 H), 2.18 (s, 6 H), 3.61 (s, 3 H), 3.88-3.95 (q, 1 H), 4.69 (s, 1 H), 6.44-6.56 (dd, 2 H), 6.63 (s, 1 H), 8.57 (s, 1 H), 8.65 (s, 1 H);  $^{13}\text{C}$  NMR (DMSO, 75 MHz):  $\delta$  (ppm): 14.68, 18.65, 38.64, 55.84, 59.13, 102.64, 112.24, 115.24, 120.09, 140.03, 145.16, 145.32, 147.15, 167.58; Elemental Analysis: Calcd. C: 63.99, H: 6.71, N: 3.73, O: 25.57, Found. C: 63.90, H: 6.70, N: 3.71, O: 25.50.

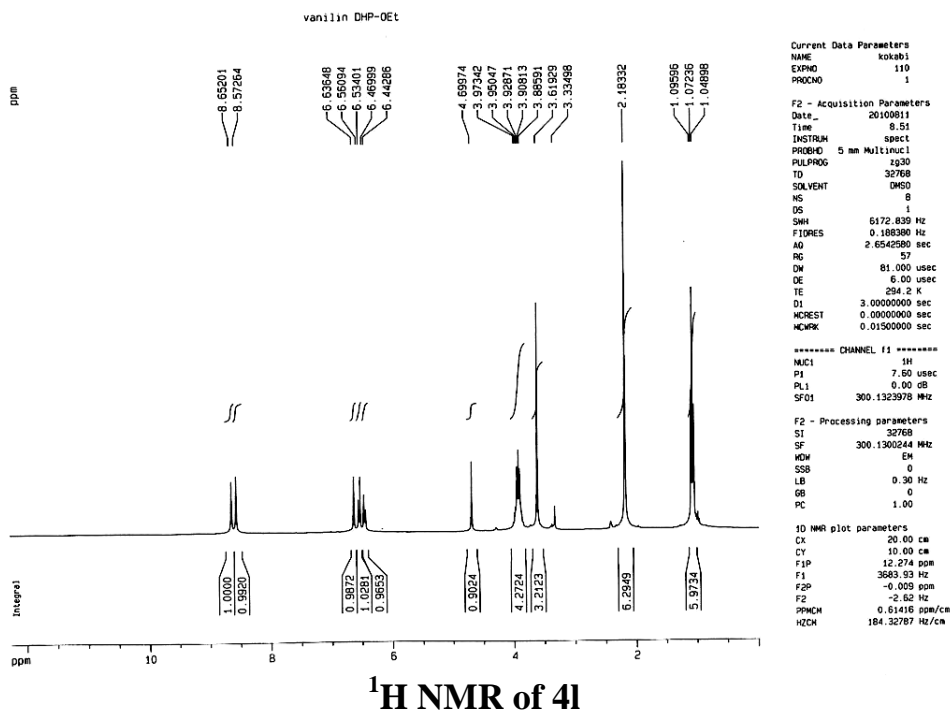

Supplementary Material (ESI) for Chemical Communications  
This journal is (c) The Royal Society of Chemistry 2011

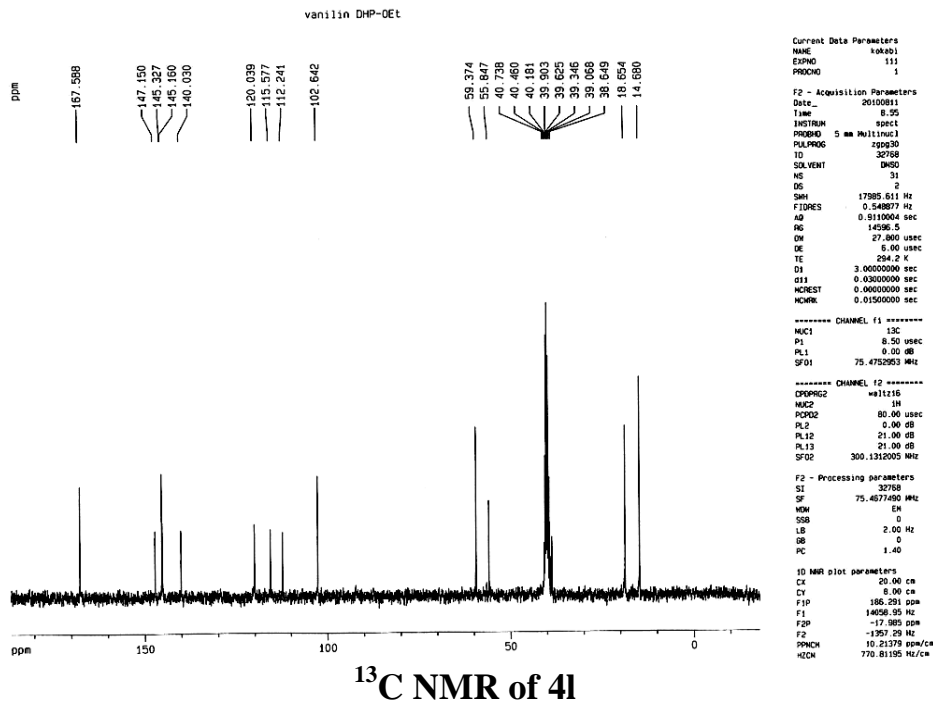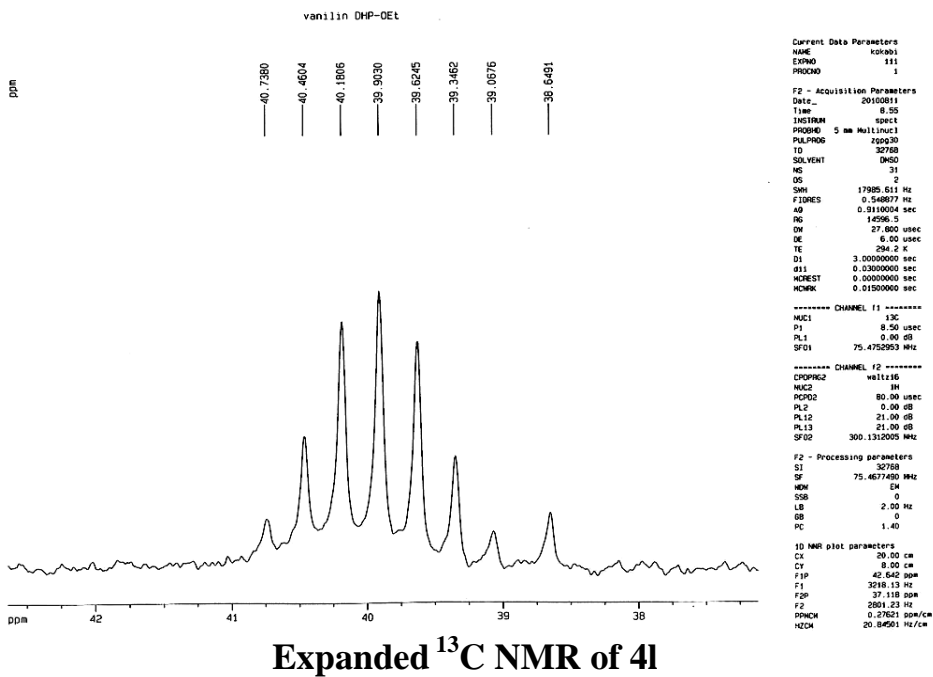

Supplementary Material (ESI) for Chemical Communications  
This journal is (c) The Royal Society of Chemistry 2011

# Diethyl 4-(furan-2-yl)-2,6-dimethyl-1,4-dihydropyridine-3,5-dicarboxylate<sup>7</sup>

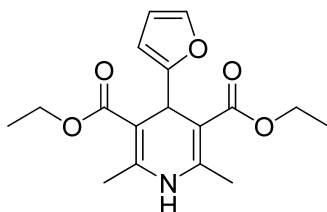

Mp: 161-162 °C; <sup>1</sup>H NMR (CDCl<sub>3</sub>, 300 MHz): δ (ppm): 1.17 (t, 6 H), 2.21 (s, 6 H), 4.07 (q, 4 H), 5.11 (s, 1 H), 5.83-6.12 (m, 2H), 6.29 (s, 1H), 7.10-7.11 (t, 1 H); <sup>13</sup>C NMR (CDCl<sub>3</sub>, 75 MHz): δ (ppm): 143.31, 19.29, 33.38, 59.82, 100.41, 104.39, 110.00, 140.78, 145.51, 158.76, 167.65; Elemental Analysis: Calcd. C: 63.94, H: 6.63, N: 4.39, O: 25.05, Found. C: 63.91, H: 6.59, N: 4.32, O: 25.01.

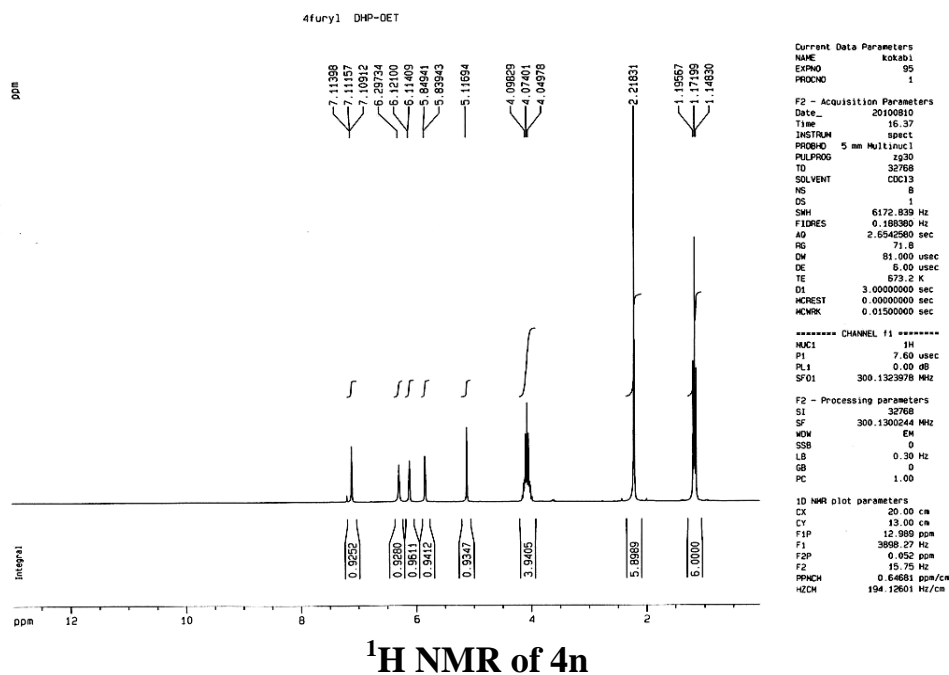

Supplementary Material (ESI) for Chemical Communications  
This journal is (c) The Royal Society of Chemistry 2011

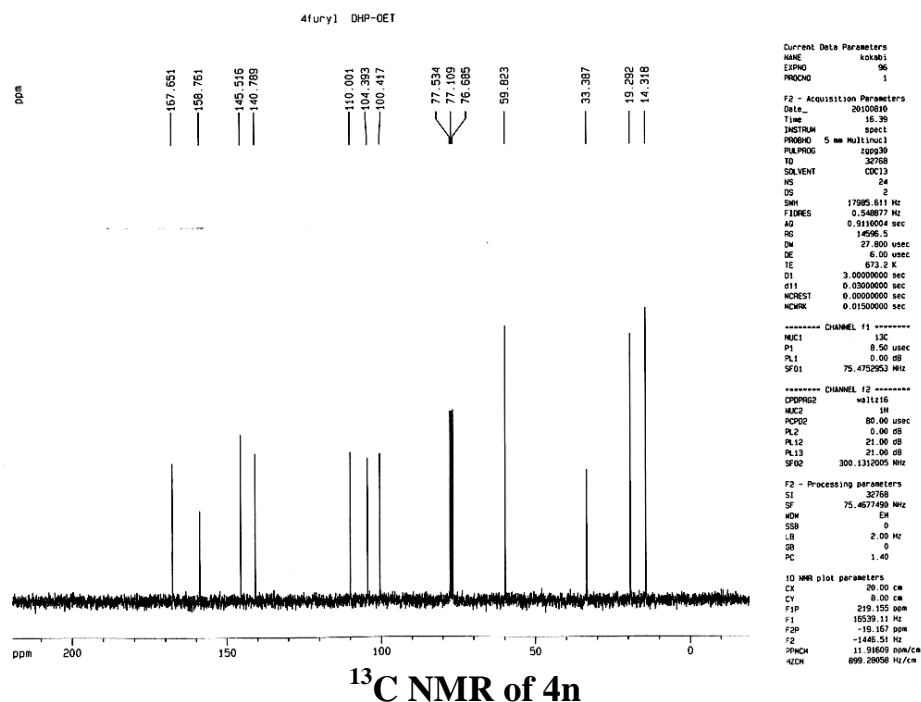

**Dimethyl 2,6-dimethyl-4-phenyl-1,4-dihydropyridine-3,5-dicarboxylate<sup>9</sup>**

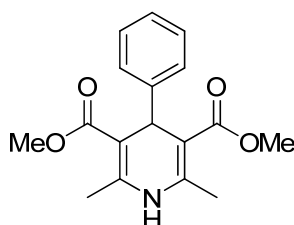

Mp: 196–197 °C; <sup>1</sup>H NMR (CDCl<sub>3</sub>, 300 MHz): δ (ppm): 2.23 (s, 6 H), 3.75 (s, 6 H), 4.95 (s, 1 H), 6.09 (b, 1 H), 7.14–7.21 (m, 4 H); <sup>13</sup>C NMR (CDCl<sub>3</sub>, 75 MHz): δ (ppm): 19.41, 38.28, 51.03, 103.64, 126.23, 127.60, 128.05, 144.61, 147.48, 168.22; Elemental Analysis: Calcd. C: 67.76, H: 6.36, N: 4.65, O: 21.24, Found. C: 67.43, H: 6.31, N: 4.56, O: 21.20.

Supplementary Material (ESI) for Chemical Communications  
This journal is (c) The Royal Society of Chemistry 2011

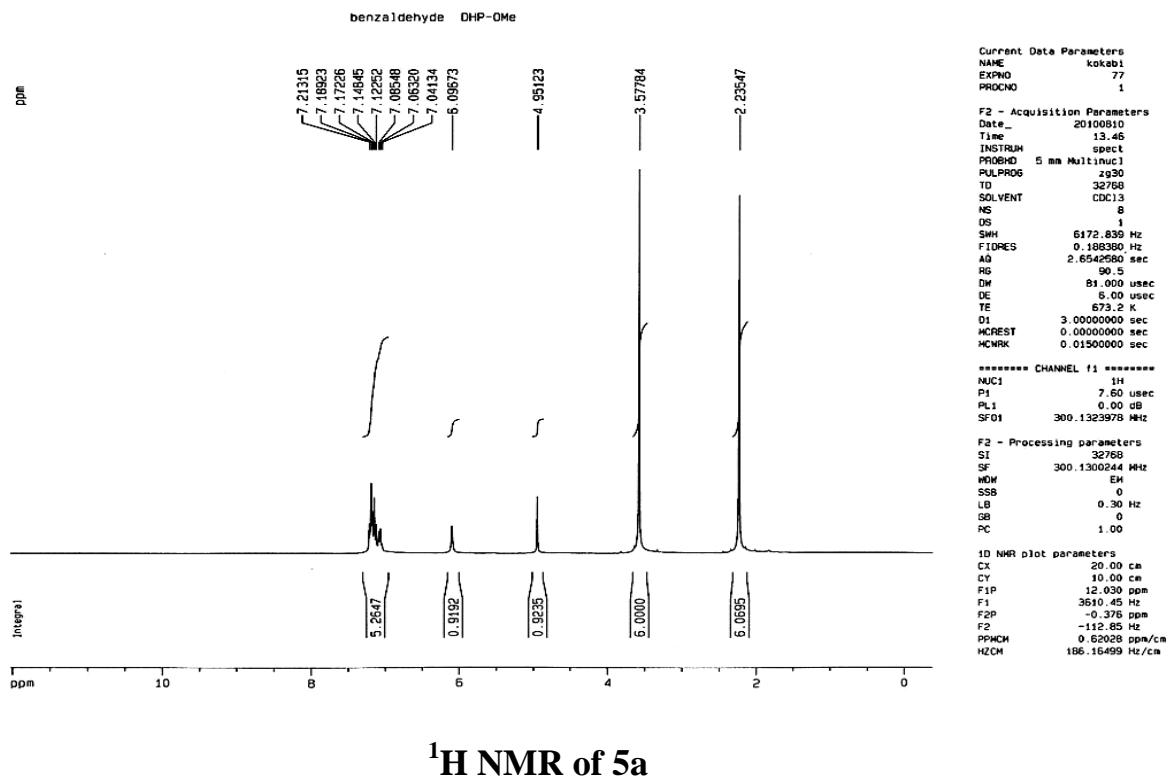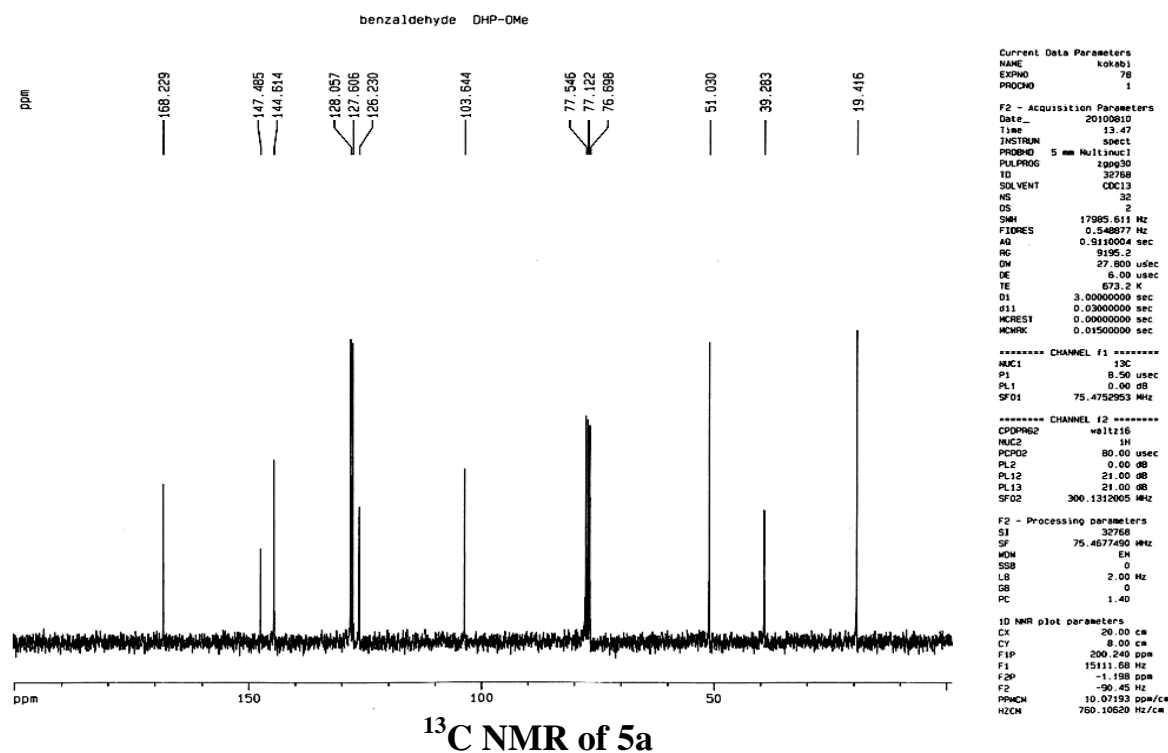



Supplementary Material (ESI) for Chemical Communications  
This journal is (c) The Royal Society of Chemistry 2011

**Dimethyl 4-(4-fluorophenyl)-2,6-dimethyl-1,4-dihydropyridine-3,5-dicarboxylate<sup>10</sup>**

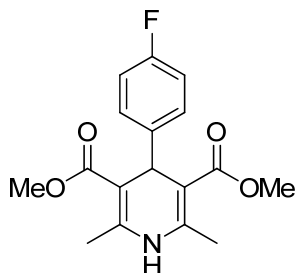

Mp: 171-172 °C; <sup>1</sup>H NMR (CDCl<sub>3</sub>, 300 MHz): δ (ppm): 2.20 (s, 6 H), 3.56 (s, 6 H), 4.91 (s, 1 H), 6.39 (s, 1 H), 7.16-6.76 (m, 4 H); <sup>13</sup>C NMR (CDCl<sub>3</sub>, 75 MHz): δ (ppm): 19.28, 38.71, 51.03, 103.49, 114.55, 114.83, 129.01, 129.12, 143.49, 144.78, 159/75, 162.98, 168.21; Elemental Analysis: Calcd. C: 63.94, H: 5.68, N: 4.39, O: 20.04, Found. C: 63.73, H: 5.65, N: 4.33, O: 20.02.

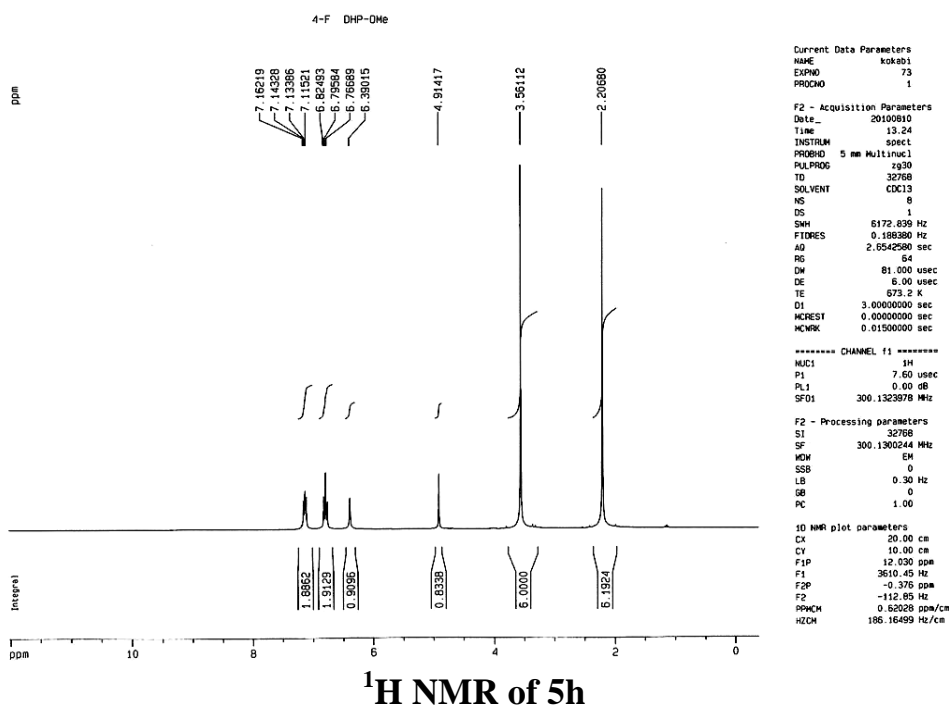

Supplementary Material (ESI) for Chemical Communications  
This journal is (c) The Royal Society of Chemistry 2011

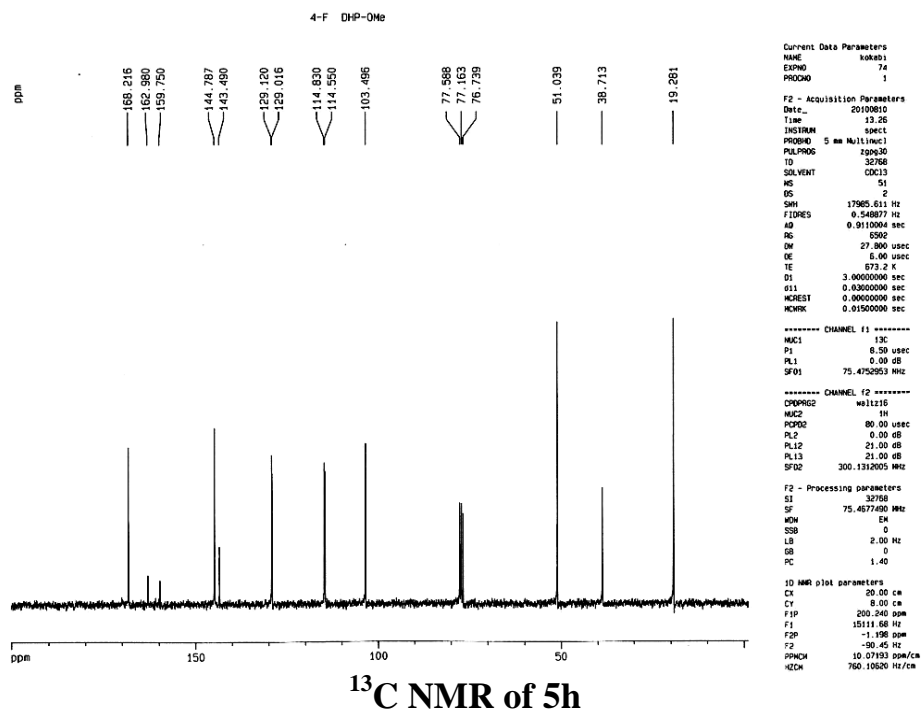

**Dimethyl 4-(4-cyanophenyl)-2,6-dimethyl-1,4-dihydropyridine-3,5-dicarboxylate**

Mp: 225-227 °C; <sup>1</sup>H NMR (CDCl<sub>3</sub>, 300 MHz): δ (ppm): 2.26 (s, 6 H), 3.50 (s, 6 H), 4.97 (s, 1 H), 6.00 (s, 1 H), 7.48-7.19 (m, 4 H); <sup>13</sup>C NMR (CDCl<sub>3</sub>, 75 MHz): δ (ppm): 19.50, 39.93, 51.13, 102.87, 109.73, 119.30, 128.55, 131.99, 145.09, 152.81, 167.61; Elemental Analysis: Calcd. C: 66.25, H: 5.56, N: 8.58, O: 19.61, Found. C: 66.18, H: 5.55, N: 8.54, O: 19.58.

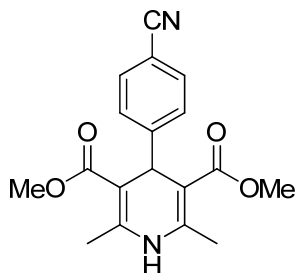

Supplementary Material (ESI) for Chemical Communications  
This journal is (c) The Royal Society of Chemistry 2011

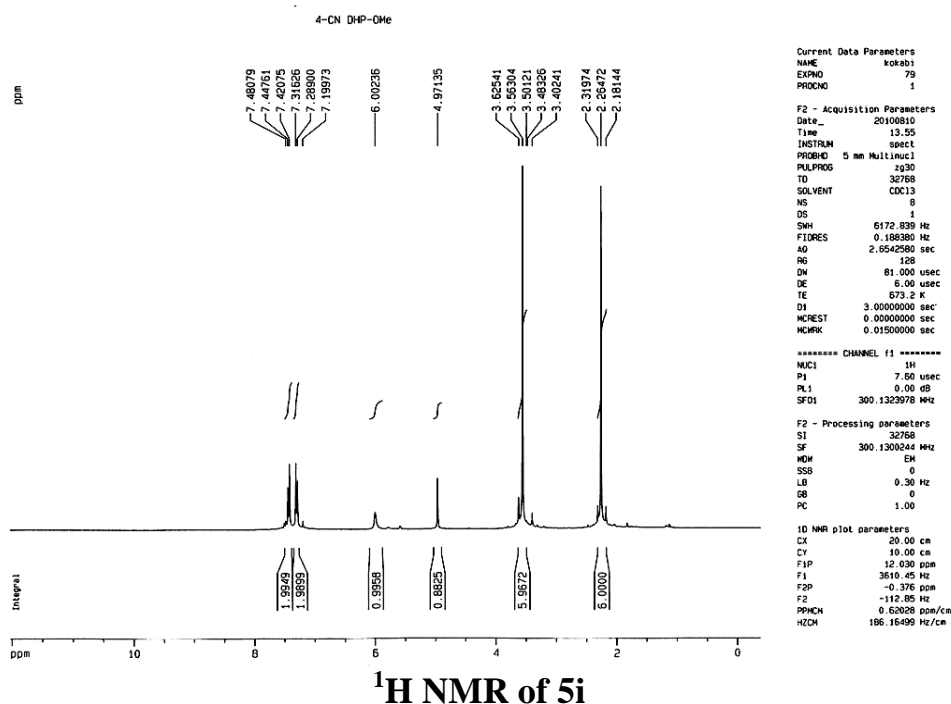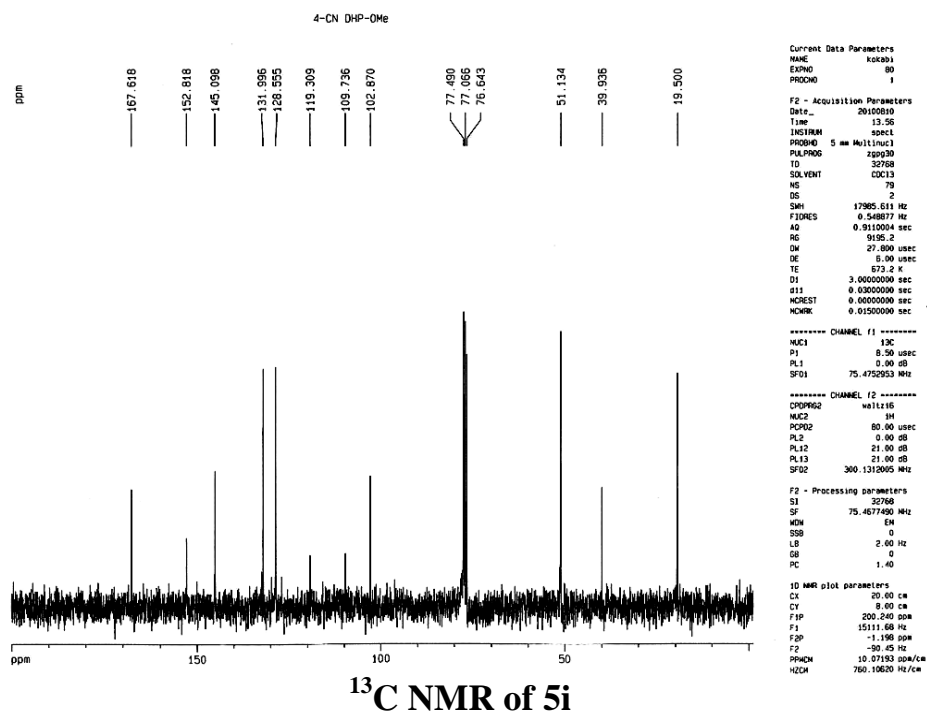

Supplementary Material (ESI) for Chemical Communications  
This journal is (c) The Royal Society of Chemistry 2011

# **Dimethyl 4-(4-bromophenyl)-2,6-dimethyl-1,4-dihydropyridine-3,5-dicarboxylate<sup>11</sup>**

Mp: 200-201 °C; <sup>1</sup>H NMR (CDCl<sub>3</sub>, 300 MHz): δ (ppm): 2.32 (s, 6 H), 3.63 (s, 6 H), 4.88 (s, 1 H), 6.08 (s, 1 H), 7.05-7.26 (m, 4 H); <sup>13</sup>C NMR (CDCl<sub>3</sub>, 75 MHz): δ (ppm): 19.45, 20.88, 39.01, 51.08, 103.33, 119.98, 129.48, 131.08, 144.69, 146.56, 167.97; Elemental Analysis: Calcd. C: 53.70, H: 4.77, N: 3.68, O: 16.83, Found. C: 53.40, H: 4.71, N: 3.62, O: 16.82.

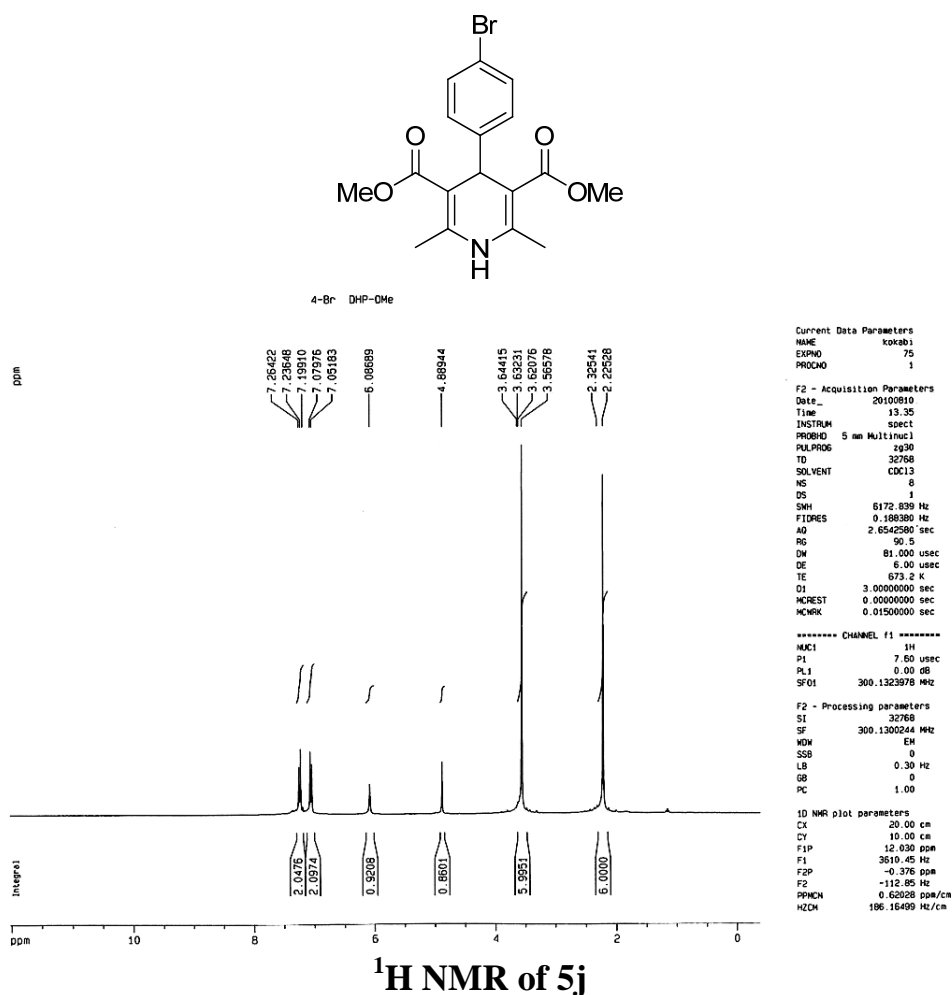

Supplementary Material (ESI) for Chemical Communications  
This journal is (c) The Royal Society of Chemistry 2011

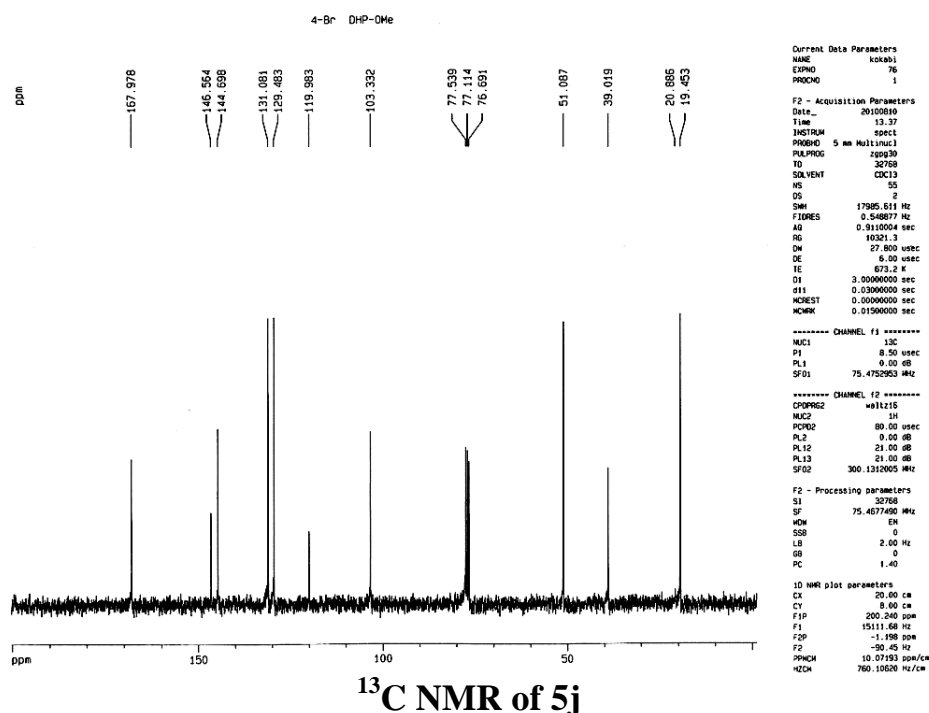

**Dimethyl 4-(4-hydroxy-3-methoxyphenyl)-2,6-dimethyl-1,4-dihydropyridine-3,5-dicarboxylate**

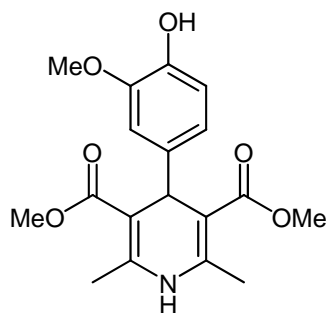

Mp: 227-228 °C; <sup>1</sup>H NMR (CDCl<sub>3</sub>, 300 MHz): δ (ppm): 2.26 (s, 6 H), 3.65 (s, 6 H), 3.77 (s, 3 H), 4.87 (s, 1 H), 5.30 (s, 1H), 5.40(s, 1H), 6.77-6.65 (m, 3 H); <sup>13</sup>C NMR (CDCl<sub>3</sub>, 75 MHz): δ (ppm): 19.64, 38.82, 50.99, 55.76, 104.04, 110.54, 113.95, 120.10, 139.65, 143.89, 168.10; Elemental Analysis: Calcd. C: 62.24, H: 6.09, N: 4.03, O: 27.64, Found. C: 62.01, H: 6.04, N: 4.01, O: 27.59.

Supplementary Material (ESI) for Chemical Communications  
This journal is (c) The Royal Society of Chemistry 2011

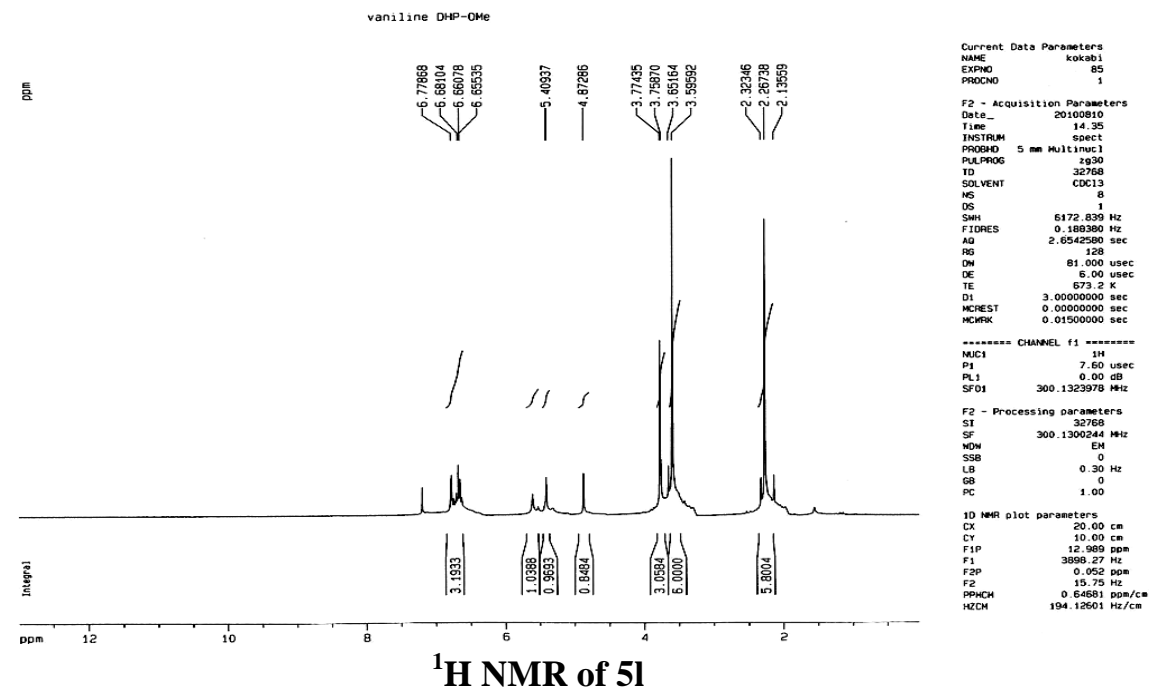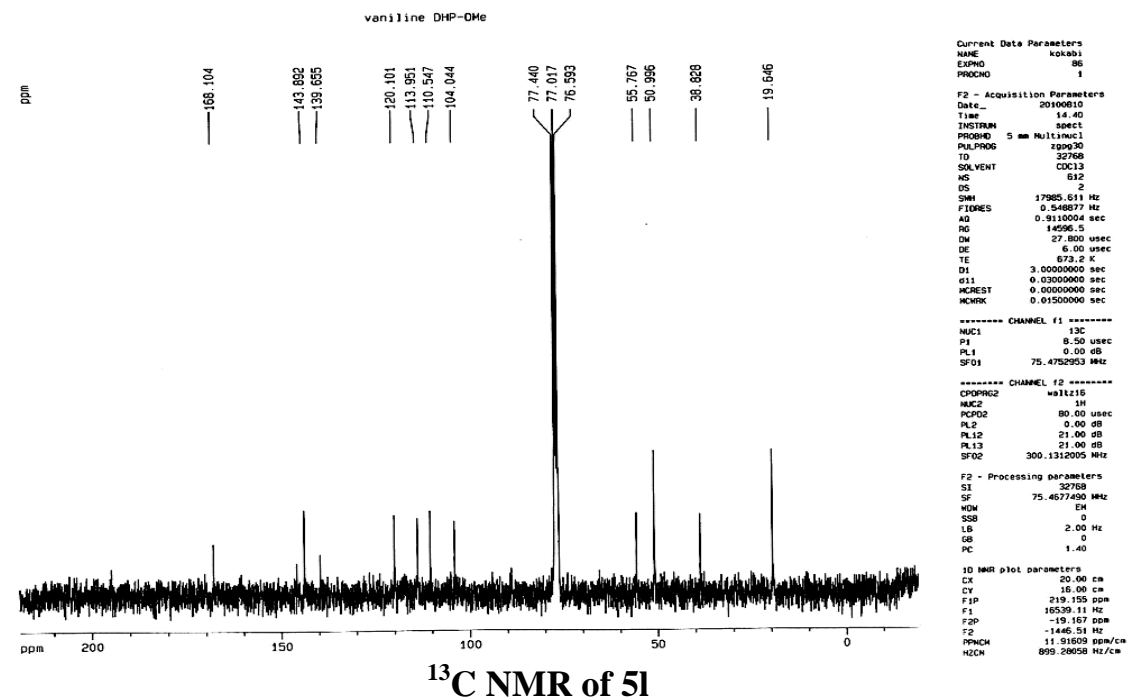

Supplementary Material (ESI) for Chemical Communications  
This journal is (c) The Royal Society of Chemistry 2011

# **Dimethyl 2,6-dimethyl-4-(3-nitrophenyl)-1,4-dihydropyridine-3,5-dicarboxylate<sup>9</sup>**

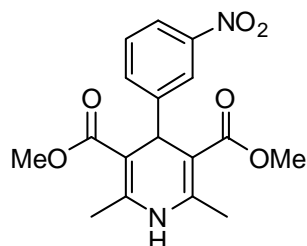

Mp: 187-190 °C; <sup>1</sup>H NMR (CDCl<sub>3</sub>, 300 MHz): δ (ppm): 2.26 (s, 6 H), 3.56(s, 6 H), 5.02 (s, 1 H), 6.29 (s, 1 H), 8.01-7.26 (m, 4 H); <sup>13</sup>C NMR (CDCl<sub>3</sub>, 75 MHz): δ (ppm): 19.44, 39.60, 51.16, 102.88, 121.39, 122.69, 128.76, 134.24, 145.37, 148.31, 149.65, 167.67; Elemental Analysis: Calcd. C: 58.96, H: 5.24, N: 8.09, O: 27.72, Found. C: 58.66, H: 5.21, N: 8.01, O: 27.70.

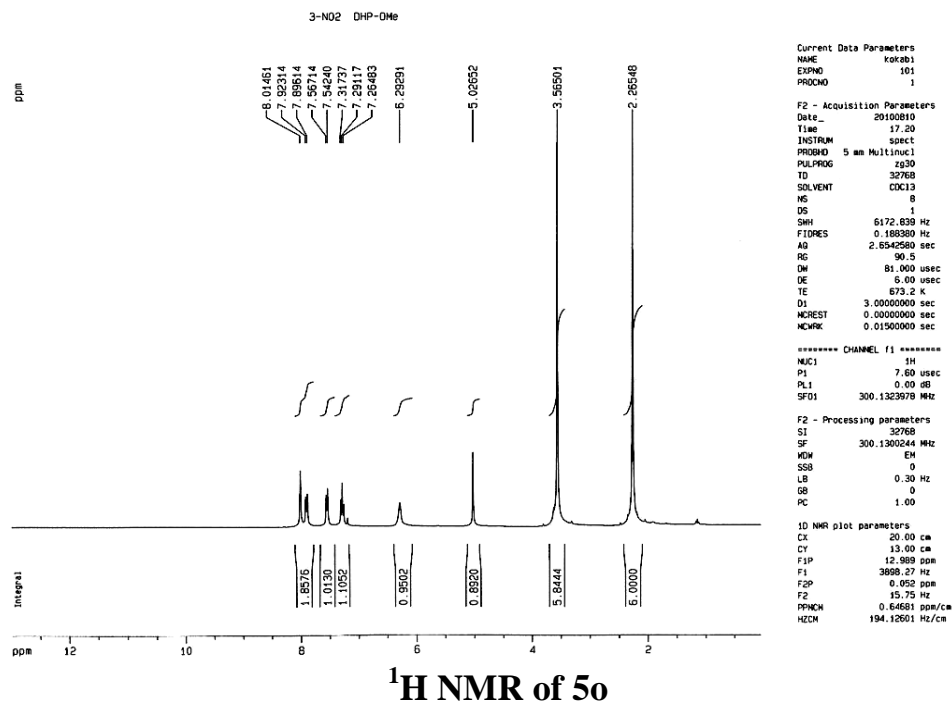

Supplementary Material (ESI) for Chemical Communications  
This journal is (c) The Royal Society of Chemistry 2011

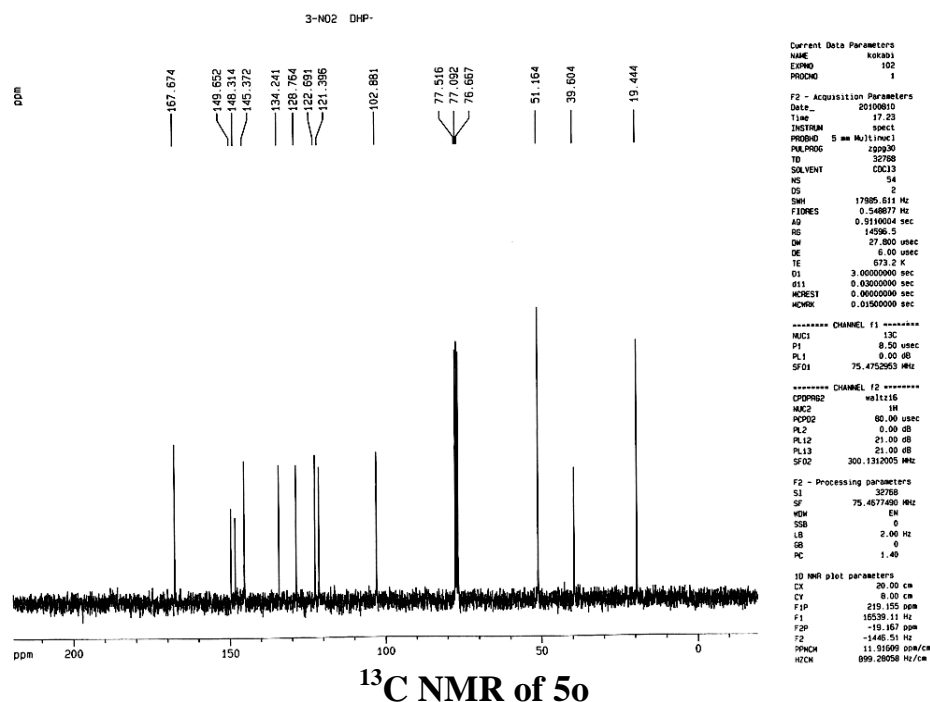

References:

- 1 Y. K. Sun, M. Ma, Y. Zhang and N. Gu, *Colloids Surf., A*, 2004, **245**, 15-19.
- 2 S. Qu, H. Yang, D. Ren, S. Kan, G. Zou, D. Li and M. Li, *J. Colloid Interface Sci.*, 1999, **215**, 190-192.
- 3 P. Li and et al., *J. Phys. D: Appl. Phys.*, 2011, **44**, 075003.
- 4 H. Zhu, Y. Ma, H. Yang, C. Ji, D. Hou and L. Guo, *J. Phys. Chem. Solids*, 2010, **71**, 1183-1186.
- 5 J. Lu, S. H. Yang, K. M. Ng, C. H. Su, C. S. Yeh, Y. N. Wu and D. B. Shieh, *Nanotechnology*, 2006, **17**, 5812-5820.
- 6 Z.-X. Sun, F.-W. Su, W. Forsling and P.-O. Samskog, *J. Catal.*, 1998, **197**, 151-159.
- 7 A. Debaché, W. Ghalem, R. Boulcina, A. Belfaitah, S. Rhouati and B. Carboni, *Tetrahedron Lett.*, 2009, **50**, 5248-5250.
- 8 A. Heydari, S. Khaksar, M. Tajbakhsh and H. R. Bijanzadeh, *J. Fluorine Chem.*, 2009, **130**, 609-614.



Supplementary Material (ESI) for Chemical Communications  
This journal is (c) The Royal Society of Chemistry 2011

- 9 B. M. Khadilkar, V. G. Gaikar and A. A. Chitnavis, *Tetrahedron Lett.*, 1995, **36**, 8083-8086.
- 10 Z. Hernandez-Gallegos, P. A. Lehmann, E. Hong, F. Posadas and E. Hernandez-Gallegos, *Eur. J. Med. Chem.*, 1995, **30**, 355-364.
- 11 B. M. Khadilkar and V. R. Madyar, *Org. Process Res. Dev.*, 2001, **5**, 452-455.
